# Supplementary material for: Effectiveness of the pre-Omicron COVID-19 vaccines against Omicron in reducing infection, hospitalization, severity, and mortality compared to Delta and other variants: A systematic review
Source: PubMed Central journal article supplement — Hum Vaccin Immunother. 2023 Mar 13;19(1):2167410. doi: 10.1080/21645515.2023.2167410 (PMC10054360; doi:10.1080/21645515.2023.2167410), 2023-03-13
Supplement: KHVI_A_2167410_SM7034.pdf [file KHVI_A_2167410_SM7034.pdf]

**Supplementary Table 1:** Types of studies, their countries and number of subjects in each study

| No. | Study                            | Study type / Source of data                        | Country                     | Total number of subjects | QA Score |
|-----|----------------------------------|----------------------------------------------------|-----------------------------|--------------------------|----------|
| 1   | Tseng et al. <sup>15</sup>       | Test-negative case-control study                   | USA                         | 113,250                  | 9        |
| 2   | Young-Xu et al. <sup>16</sup>    | Matched test-negative case-control study           | USA                         | 114,640                  | 9        |
| 3   | Eggink et al. <sup>17</sup>      | Case-only approach                                 | Netherlands                 | 174,349                  | 8        |
| 4   | Allen et al. <sup>18</sup>       | Cohort study                                       | England                     | 51,281                   | 8        |
| 5   | Abu-Raddad et al. <sup>19</sup>  | Matched retrospective cohort study                 | Qatar                       | 425,267                  | 9        |
| 6   | Accorsi et al. <sup>20</sup>     | Test-negative case control study                   | USA                         | 70155                    | 9        |
| 7   | Jalali et al. <sup>21</sup>      | Registry-based cohort study                        | Norway                      | 3291                     | 7        |
| 8   | Lauring et al. <sup>22</sup>     | Prospective, observational case-control study      | USA                         | 11544                    | 9        |
| 9   | Lyngse et al. <sup>23</sup>      | Registry-based study                               | Denmark                     | 39,811                   | 9        |
| 10  | Paredes et al. <sup>24</sup>     | Retrospective cohort study                         | USA                         | 58882                    | 9        |
| 11  | Lee et al. <sup>25</sup>         | Retrospective analysis                             | USA                         | 11,281                   | 9        |
| 12  | Lewnard et al. <sup>26</sup>     | Clinical outcome analysis                          | USA                         | 262,411                  | 9        |
| 13  | Veneti et al. <sup>27</sup>      | Registry-based cohort study                        | Norway                      | 91,005                   | 8        |
| 14  | Nunes et al. <sup>28</sup>       | Cohort surveillance study                          | South Africa                | 433                      | 8        |
| 15  | Patalon et al. <sup>29</sup>     | Retrospective test-negative case-control study     | Israel                      | 110,918                  | 9        |
| 16  | Chemaitelly et al. <sup>30</sup> | Test-negative case-control                         | Qatar                       | 138,182                  | 9        |
| 17  | Helmsdal et al. <sup>31</sup>    | Case study                                         | Faroe Islands               | 33                       | 5        |
| 18  | Andeweg et al. <sup>32</sup>     | Test-negative design                               | Netherlands                 | 671,763                  | 9        |
| 19  | Davies et al. <sup>33</sup>      | Cohort study                                       | South Africa                | 16,753                   | 8        |
| 20  | Ferdinands et al. <sup>34</sup>  | Test-negative case-control Study                   | USA                         | 334,612                  | 8        |
| 21  | Robinson et al. <sup>35</sup>    | Cohort study                                       | USA                         | 4136                     | 8        |
| 22  | Rufino et al. <sup>36</sup>      | Analysis of survey data                            | South Africa, and 20 others | 72,793                   | 3        |
| 23  | Šmíd et al. <sup>37</sup>        | Retrospective analysis                             | Czech Republic              | 395,544                  | 9        |
| 24  | Ulloa et al. <sup>38</sup>       | Retrospective population-wide matched cohort study | Canada                      | 18174                    | 7        |
| 25  | Powell et al. <sup>39</sup>      | Test-negative case-control study                   | England                     | 965,843                  | 9        |
| 26  | Tai et al. <sup>40</sup>         | Cohort study                                       | USA                         | 2613                     | 6        |
| 27  | Nguyen et al. <sup>41</sup>      | Prospective observational study                    | England and Wales           | 19692                    | 7        |
| 28  | Shrestha et al. <sup>42</sup>    | Retrospective cohort study                         | USA                         | 52238                    | 7        |

|    |                                      |                                                     |              |                   |           |
|----|--------------------------------------|-----------------------------------------------------|--------------|-------------------|-----------|
| 29 | Spensley et al. <sup>43</sup>        | Cohort study                                        | England      | 1121              | 7         |
| 30 | Hansen et al. <sup>44</sup>          | Cohort study                                        | Denmark      | 49615             | 8         |
| 31 | Dorabawila et al. <sup>45</sup>      | Database study                                      | USA          | 1,427,579         | 7         |
| 32 | Buchan et al. <sup>46</sup>          | Test-negative study design                          | Canada       | 134435            | 8         |
| 33 | Collie et al. <sup>47</sup>          | Test-negative design                                | South Africa | 211610            | 8         |
| 34 | Krutikov et al. <sup>48</sup>        | Cohort study                                        | England      | 1639              | 8         |
| 35 | Wolter et al. <sup>49</sup>          | Data linkage study                                  | South Africa | 11495             | 9         |
| 36 | Ward et al. <sup>50</sup>            | Retrospective cohort study                          | England      | 1035163           | 7         |
| 37 | Wolter et al. <sup>51</sup>          | Data linkages study                                 | South Africa | 95470             | 7         |
| 38 | Marks et al. <sup>52</sup>           | Population-based surveillance study                 | USA          | 2100              | 4         |
| 39 | Chaguza et al. <sup>53</sup>         | Cohort study                                        | USA          | 37877             | 6         |
| 40 | Chemaitelly et al. <sup>54</sup>     | Matched retrospective cohort study                  | Qatar        | 242244            | 9         |
| 41 | Boscolo-Rizzo et al. <sup>55</sup>   | Prospective study                                   | Italy        | 779               | 7         |
| 42 | Auvigne et al. <sup>56</sup>         | Retrospective population-based matched cohort study | France       | 184364            | 8         |
| 43 | Bar-On et al. <sup>57</sup>          | Database-based cohort study                         | Israel       | 57709             | 9         |
| 44 | Boucau et al. <sup>58</sup>          | Longitudinal cohort study                           | USA          | 56                | 5         |
| 45 | Peralta-Santos et al. <sup>59</sup>  | Cohort study                                        | Portugal     | 15978             | 8         |
| 46 | Thompson et al. <sup>60</sup>        | Test-negative design                                | USA          | 53719             | 5         |
| 47 | Lyngse et al. <sup>61</sup>          | Registry-based study                                | Denmark      | 26486             | 8         |
| 48 | Vieillard-Baron et al. <sup>62</sup> | Retrospective analysis                              | France       | 3761              | 9         |
| 49 | Andrews et al. <sup>63</sup>         | Test-negative case control study                    | England      | 2,663,549         | 8         |
| 50 | Gray et al. <sup>64</sup>            | Test-negative study                                 | South Africa | 52,468            | 7         |
| 51 | Klein et al. <sup>65</sup>           | Test-negative case control study                    | USA          | 40,916            | 8         |
|    | <b>Total</b>                         | <b>NA</b>                                           | <b>NA</b>    | <b>10,581,027</b> | <b>NA</b> |

QA=Quality Assessment; NA=Not Applicable

**Supplementary Table 4:** Effectiveness of the COVID-19 vaccines against the Omicron variant in reducing severity as compared to other variants.

| Study                           | Vaccine           | Dose                 | Omicron                                                                                                                                                                                                                                                                                       | Other variants |                                                                                                                                                                                                                                                                                             |
|---------------------------------|-------------------|----------------------|-----------------------------------------------------------------------------------------------------------------------------------------------------------------------------------------------------------------------------------------------------------------------------------------------|----------------|---------------------------------------------------------------------------------------------------------------------------------------------------------------------------------------------------------------------------------------------------------------------------------------------|
|                                 |                   |                      | Severity                                                                                                                                                                                                                                                                                      | Variant        | Severity                                                                                                                                                                                                                                                                                    |
| Abu-Raddad et al. <sup>19</sup> | Pfizer            | 3 doses (vs 2 doses) | *Adjusted VE (95% CI): 76.5 (55.9-87.5)                                                                                                                                                                                                                                                       |                |                                                                                                                                                                                                                                                                                             |
| Lauring et al. <sup>22</sup>    | Pfizer or Moderna | 2 or 3 doses         | <i>Overall</i><br>VE (95% CI):<br>** 46 (12-67)<br><br><i>Immunocompetent Only</i><br>VE (95% CI): 44 (0-69)<br><br><i>Immunocompromised Only</i><br>VE (95% CI): 42 (-61-79)<br><br><i>18-64 years old</i><br>VE (95% CI): 55 (7-78)<br><br><i>≥65 years old</i><br>VE (95% CI): 37 (-32-69) | Alpha          | <i>Overall</i> VE (95% CI):<br>** 76 (53-88)<br><br><i>Immunocompetent Only</i><br>VE (95% CI): 73 (39-88)<br><br><i>Immunocompromised Only</i><br>VE (95% CI): 77 (7-94)                                                                                                                   |
|                                 | Pfizer or Moderna |                      |                                                                                                                                                                                                                                                                                               | Delta          | <i>Overall</i> VE (95% CI):<br>** 44 (32-54)<br><br><i>Immunocompetent Only</i><br>VE (95% CI): 50 (37-60)<br><br><i>Immunocompromised Only</i><br>VE (95% CI): 15 (-26-43)<br><br><i>18-64 years old</i><br>VE (95% CI): 49 (32-62)<br><br><i>≥65 years old</i><br>VE (95% CI): 44 (26-57) |
| Buchan et al. <sup>46</sup>     | mRNA              | 1 or 2 doses         | <i>7-59 days follow up</i><br>Adjusted VE (95% CI):<br>55 (-106-90)<br><br><i>≥240 days follow up</i><br>Adjusted VE (95% CI):<br>86 (12-98)                                                                                                                                                  | Delta          | <i>7-59 days follow up</i><br>Adjusted VE (95% CI):<br>94 (84-98)<br><br><i>≥240 days follow up</i><br>Adjusted VE (95% CI):<br>95 (85-99)                                                                                                                                                  |
|                                 | mRNA              | 3 doses              | <i>0-6 days follow up</i><br>Adjusted VE (95% CI):<br>91 (71-97)                                                                                                                                                                                                                              | Delta          | <i>0-6 days follow up</i><br>Adjusted VE (95% CI):<br>99 (97-99)                                                                                                                                                                                                                            |

| Study                            | Vaccine                                                | Dose    | Omicron                                                                                                                                                             | Other variants |                                                                                                                                                                     |
|----------------------------------|--------------------------------------------------------|---------|---------------------------------------------------------------------------------------------------------------------------------------------------------------------|----------------|---------------------------------------------------------------------------------------------------------------------------------------------------------------------|
|                                  |                                                        |         | Severity                                                                                                                                                            | Variant        | Severity                                                                                                                                                            |
|                                  |                                                        |         | <p><math>\geq 7</math> days follow up<br/>Adjusted VE (95% CI):<br/>95 (87-98)</p>                                                                                  |                | <p><math>\geq 7</math> days follow up<br/>Adjusted VE (95% CI):<br/>99 (98-99)</p>                                                                                  |
|                                  | Pfizer                                                 | 3 doses | <p>0-6 days follow up<br/>Adjusted VE (95% CI):<br/>88 (62-96)</p> <p><math>\geq 7</math> days follow up<br/>Adjusted VE (95% CI):<br/>95 (87-98)</p>               | Delta          | <p>0-6 days follow up<br/>Adjusted VE (95% CI):<br/>36 (24-45)</p> <p><math>\geq 7</math> days follow up<br/>Adjusted VE (95% CI):<br/>99 (98-99)</p>               |
|                                  | Moderna                                                | 3 doses | <p>0-6 days follow up<br/>Adjusted VE (95% CI): NR</p> <p><math>\geq 7</math> days follow up<br/>Adjusted VE (95% CI):<br/>93 (74-98)</p>                           | Delta          | <p>0-6 days follow up<br/>Adjusted VE (95% CI):<br/>NR</p> <p><math>\geq 7</math> days follow up<br/>Adjusted VE (95% CI):<br/>100 (98-100)</p>                     |
| Šmíd et al. <sup>37</sup>        | &&Pfizer,<br>Moderna,<br>AstraZene<br>ca or<br>Janssen | 2 doses | <p>&lt;2 months<br/>Adjusted VE (95% CI):<br/>## 57 (32-72)<br/>** 58 (3-82)</p> <p>&gt;2 months<br/>Adjusted VE (95% CI):<br/>## 32 (20-43)<br/>** 37 (12-55)</p>  | Delta          | <p>&lt;2 months<br/>Adjusted VE (95% CI):<br/>## 82 (76-87)<br/>** 84 (72-91)</p> <p>&gt;2 months<br/>Adjusted VE (95% CI):<br/>## 82 (80-83)<br/>** 86 (83-88)</p> |
|                                  |                                                        | Booster | <p>&lt;2 months<br/>Adjusted VE (95% CI):<br/>## 90 (87-92)<br/>** 83 (75-89)</p> <p>&gt;2 months<br/>Adjusted VE (95% CI):<br/>## 85 (80-88)<br/>** 60 (37-74)</p> | Delta          | <p>&lt;2 months<br/>Adjusted VE (95% CI):<br/>## 98 (98-98)<br/>** 98 (97-99)</p> <p>&gt;2 months<br/>Adjusted VE (95% CI):<br/>## 97 (95-98)<br/>** 97 (92-99)</p> |
| Chemaitelly et al. <sup>54</sup> | Pfizer                                                 | 1 dose  |                                                                                                                                                                     | COVID-19       | Adjusted VE (95% CI):<br>40.9 (-199.1-88.3)                                                                                                                         |
|                                  |                                                        | 2 doses |                                                                                                                                                                     |                | <p>1-6 months<br/>Adjusted VE (95% CI):<br/>70.4 (45.0-84.0)</p> <p>7+ months<br/>Adjusted VE (95% CI):<br/>77.5 (67.8-84.3)</p>                                    |
|                                  |                                                        | 3 doses |                                                                                                                                                                     |                | 1-6 weeks                                                                                                                                                           |

| Study                         | Vaccine                                | Dose                                                  | Omicron                                                                                                                                                                                                             | Other variants    |                                                                                                                                                                                                                                                                 |
|-------------------------------|----------------------------------------|-------------------------------------------------------|---------------------------------------------------------------------------------------------------------------------------------------------------------------------------------------------------------------------|-------------------|-----------------------------------------------------------------------------------------------------------------------------------------------------------------------------------------------------------------------------------------------------------------|
|                               |                                        |                                                       | Severity                                                                                                                                                                                                            | Variant           | Severity                                                                                                                                                                                                                                                        |
|                               |                                        |                                                       |                                                                                                                                                                                                                     |                   | Adjusted VE (95% CI): 90.9 (78.6-96.1)<br><br>7+ weeks Adjusted VE (95% CI): 90.1 (80.6-95.0)                                                                                                                                                                   |
|                               | Moderna                                | 2 doses                                               |                                                                                                                                                                                                                     |                   | 1-6 months Adjusted VE (95% CI): 87.1 (40.2-97.2)<br><br>7+ months Adjusted VE (95% CI): 68.4 (46.1-81.5)                                                                                                                                                       |
|                               |                                        | 3 doses                                               |                                                                                                                                                                                                                     |                   | 1-6 weeks Adjusted VE (95% CI): 81.8 (-49.5-97.8)                                                                                                                                                                                                               |
| Robinson et al. <sup>35</sup> | #Pfizer, Moderna or Janssen            | Vaccinated or Prior Infection                         |                                                                                                                                                                                                                     | Omicron and Delta | Adjusted HR: 0.46 (IQR 0.34-0.62)                                                                                                                                                                                                                               |
| Ulloa et al. <sup>38</sup>    | ##NR                                   | 2 doses                                               |                                                                                                                                                                                                                     | Omicron VS Delta  | HR (95% CI): 0.09 (0.02-0.38)                                                                                                                                                                                                                                   |
| Davies et al. <sup>33</sup>   | &Pfizer or Janssen                     | Fully Vaccinated                                      | Adjusted HR (95% CI): 0.28 (0.16-0.50)                                                                                                                                                                              | Delta             | Adjusted HR (95% CI): 0.38 (0.27-0.52)                                                                                                                                                                                                                          |
| Shrestha et al. <sup>42</sup> | Pfizer or Moderna                      | 2 doses<br><i>≥14 days</i>                            | <i>overall</i><br>Adjusted HR (95% CI): 0.22 (0.20–0.24)<br><br><i>AND prior infection</i><br>Adjusted HR (95% CI): 0.36 (0.23-0.57)<br><br><i>AND no prior infection</i><br>Adjusted HR (95% CI): 0.22 (0.20–0.24) | Pre-Omicron       | <i>overall</i><br>Adjusted HR (95% CI): 0.24 (0.22-0.26)<br><br><i>AND prior infection</i><br>Adjusted HR (95% CI): 0.60 (0.40-0.90)<br><br><i>AND no prior infection</i><br>Adjusted HR (95% CI): 0.25 (0.22-0.26)                                             |
| Auvigne et al. <sup>56</sup>  | ^Pfizer, Moderna, AstraZeneca, Janssen | Booster<br><br><i>Compared to primary vaccination</i> | <i>≥80 year olds</i><br>Adjusted HR (95% CI): 0.29 (0.12-0.69)                                                                                                                                                      | Omicron OR Delta  | <i>General</i><br>Adjusted HR (95% CI): 0.99 (0.55-1.79)<br><br><i>18-39 year olds</i><br>Adjusted HR (95% CI): 3.08 (0.66-14.3)<br><br><i>40-64 year olds</i><br>Adjusted HR (95% CI): 1.00 (0.56-1.81)<br><br><i>65-79 year olds</i><br>Adjusted HR (95% CI): |

| Study                        | Vaccine                                 | Dose                                                       | Omicron                                                 | Other variants    |                                                                                                                                                                                                                                                                                                                                                 |
|------------------------------|-----------------------------------------|------------------------------------------------------------|---------------------------------------------------------|-------------------|-------------------------------------------------------------------------------------------------------------------------------------------------------------------------------------------------------------------------------------------------------------------------------------------------------------------------------------------------|
|                              |                                         |                                                            | Severity                                                | Variant           | Severity                                                                                                                                                                                                                                                                                                                                        |
|                              |                                         |                                                            |                                                         |                   | 0.82 (0.56-1.19)<br><br>≥80 year olds<br>Adjusted HR (95% CI):<br>0.89 (0.52-1.51)                                                                                                                                                                                                                                                              |
|                              |                                         | Unvaccinated<br><br><i>Compared to primary vaccination</i> | ≥80 year olds<br>Adjusted HR (95% CI): 3.41 (1.63-7.15) |                   | <i>General</i><br>Adjusted HR (95% CI): 7.57 (5.79-9.88)<br><br><i>18-39 year olds</i><br>Adjusted HR (95% CI): 13.2 (6.09-28.7)<br><br><i>40-64 year olds</i><br>Adjusted HR (95% CI): 7.29 (5.58-9.54)<br><br><i>65-79 year olds</i><br>Adjusted HR (95% CI): 4.21 (3.19-5.57)<br><br>≥80 year olds<br>Adjusted HR (95% CI): 3.39 (2.28-5.03) |
|                              | Pfizer, Moderna, AstraZeneca, Janssen   | Booster<br><br><i>Compared to primary vaccination</i>      |                                                         | Delta             | ≥80 year olds<br>Adjusted HR (95% CI): 0.87 (0.51-1.47)                                                                                                                                                                                                                                                                                         |
|                              |                                         | Unvaccinated<br><br><i>Compared to primary vaccination</i> |                                                         |                   | ≥80 year olds<br>Adjusted HR (95% CI): 3.41 (2.29-5.07)                                                                                                                                                                                                                                                                                         |
| Boucau et al.<br>58          | ^^Pfizer, Moderna, AstraZeneca, Janssen | Vaccinated                                                 |                                                         | Delta/<br>Omicron | Adjusted HR (95% CI): 0.51 (0.23-1.09)                                                                                                                                                                                                                                                                                                          |
|                              |                                         | Boosted                                                    |                                                         |                   | Adjusted HR (95% CI): 1.16 (0.39-3.45)                                                                                                                                                                                                                                                                                                          |
| Wolter et al.<br>51          | ###Pfizer or Janssen                    | Vaccinated                                                 | Adjusted OR (95% CI): 0.52 (0.33-0.82)                  |                   |                                                                                                                                                                                                                                                                                                                                                 |
| Vieillard-Baron et al.<br>62 | ***Pfizer, Moderna or AstraZeneca       | Vaccinated Overall                                         | 23.05% relative risk reduction                          | Delta             | 10.5% relative risk reduction (p < 0.001 Omicron vs Delta)                                                                                                                                                                                                                                                                                      |
| Boscolo-Rizzo et al.<br>55   | NR                                      | \$Fully Vaccinated                                         | Adjusted OR (95% CI): 0.91 (0.52-1.60)                  |                   |                                                                                                                                                                                                                                                                                                                                                 |
| Wolter et al.<br>49          | Pfizer, Janssen                         | \$\$Vaccinated                                             |                                                         | Omicron/Delta     | Adjusted OR (95% CI): 0.6 (0.2-1.5)                                                                                                                                                                                                                                                                                                             |
| Bar-On et al.<br>57          | ^^^Pfizer                               | 3 doses vs 4 doses ≥12 days                                | RR (95% CI): 4.3 (2.4-7.6)                              |                   |                                                                                                                                                                                                                                                                                                                                                 |

| Study                    | Vaccine            | Dose                                             | Omicron                                   | Other variants |          |
|--------------------------|--------------------|--------------------------------------------------|-------------------------------------------|----------------|----------|
|                          |                    |                                                  | Severity                                  | Variant        | Severity |
|                          |                    | 4 doses<br>3-7 days<br>vs<br>4 doses<br>≥12 days | RR (95% CI):<br>4.0 (2.2-7.5)             |                |          |
| Tai et al. <sup>40</sup> | mRNA or<br>Janssen | Booster<br>compared to<br>fully vaccinated       | Adjusted HR (95%<br>CI): 0.39 (0.30-0.50) |                |          |

\*Fully vaccinated: 2-dose mRNA vaccines as REF for VE. Severe COVID-19 was defined per the World health Organization (WHO) classification

\*\* Severity VE is effectiveness to prevent disease progression to invasive mechanical ventilation or death

&& Severity defined as “hospitalization with need for oxygen therapy” of “hospitalization with need for intensive care.”

##Severity defined as ICU admission or death

# Severity defined as severe disease or death. 1 dose of Janssen, or 2 doses of Pfizer or Moderna >2 weeks prior to hospitalization were classified as vaccinated. Prior infection was defined by positive SARS-CoV-2 test >60 days prior to hospitalization.

& Fully Vaccinated: 2 doses (≥14 days) of Pfizer or 1 dose (≥28 days) of Janssen.

^ with primary vaccination. Severity defined as the risk of a severe hospital event. Adjusted for age, sex, vaccination status, presence of comorbidity and region of residence.

^^ Severity defined as “PCR conversion time”. Vaccinated: those who had received two COVID-19 vaccinations (or a single dose of the Johnson & Johnson/Janssen vaccine) at least 14 days prior to enrollment. Boosted: those who had received three COVID-19 vaccinations (or a second dose of the Johnson & Johnson/Janssen vaccine) at least 14 days prior to enrollment.

### Vaccinated: at least 1 dose of Pfizer or Janssen. Severity defined as a hospitalized patient meeting at least one of the following criteria: admitted to ICU, received oxygen treatment, ventilated, received extracorporeal membrane oxygenation (ECMO), experienced acute respiratory distress syndrome (ARDS) and/or died.

\*\*\* Severity defined as pneumonia. Vaccinated overall defined as at least 1 injection of vaccine. Relative risk reduction calculated as (unvaccinated-vaccinated)/unvaccinated.

\$ Severity defined as chemosensory dysfunction. **Fully Vaccinated:** received the required dose(s) of a SARS-CoV-2 vaccine and were at least 14 days after completion.

\$\$ **Vaccination** was defined as having at least one dose of a SARS-CoV-2 vaccine (Ad.26.COV2.S [Johnson & Johnson] or BNT162b2 [Pfizer–BioNTech]).

^^^ Severity defined as severe illness using the NIH definition. The study included those that were 60 years of age or older and had received three doses of BNT162b2 at least 4 months before the start of the study period.

**Supplementary Table 5:** Effectiveness of the COVID-19 vaccines against the Omicron variant in reducing mortality as compared to other variants.

| Study                         | Vaccine                      | Dose                                                 | Omicron                                             | Other variants   |                                                                                                                                                                                                                         |
|-------------------------------|------------------------------|------------------------------------------------------|-----------------------------------------------------|------------------|-------------------------------------------------------------------------------------------------------------------------------------------------------------------------------------------------------------------------|
|                               |                              |                                                      | Death                                               | Variant          | Death                                                                                                                                                                                                                   |
| Young-Xu et al. <sup>16</sup> | mRNA                         | 2 doses<br><i>≥14 days</i>                           | Adjusted VE (95% CI):<br>75 (52-87)<br>* 59 (25-77) | Delta            | Adjusted VE (95% CI):<br>93 (85-97)<br>* 80 (65-89)                                                                                                                                                                     |
|                               | mRNA                         | 3 doses<br><i>≥14 days</i>                           | Adjusted VE (95% CI):<br>94 (85-98)<br>* 83 (63-92) |                  | Adjusted VE (95% CI):<br>96 (88-99)<br>*60 (24-87)                                                                                                                                                                      |
| Davies et al. <sup>33</sup>   | Pfizer or Janssen            | **Fully Vaccinated                                   | Adjusted HR (95% CI):<br>0.24 (0.10-0.58)           | Delta            | Adjusted HR (95% CI):<br>0.35 (0.22-0.54)                                                                                                                                                                               |
| Ward et al. <sup>50</sup>     | Pfizer, Moderna, AstraZeneca | 2 doses                                              |                                                     | Omicron VS Delta | <i>18-59 year olds</i><br>Adjusted HR (95% CI):<br>0.56 (0.13-2.45)<br><br><i>60-69 year olds</i><br>Adjusted HR (95% CI):<br>0.22 (0.06-0.88)<br><br><i>≥70 year olds</i><br>Adjusted HR (95% CI):<br>0.99 (0.31–3.10) |
|                               |                              | Booster                                              |                                                     |                  | <i>18-59 year olds</i><br>Adjusted HR (95% CI):<br>0.06 (0.01-0.25)<br><br><i>60-69 year olds</i><br>Adjusted HR (95% CI):<br>0.06 (0.01-0.26)<br><br><i>≥70 year olds</i><br>Adjusted HR (95% CI):<br>0.33 (0.10-1.06) |
| Lee et al. <sup>25</sup>      | Pfizer, Moderna or Janssen   | Full vaccination or Booster                          | OR (95% CI):<br>2.38 (0.51- 22.34)                  |                  |                                                                                                                                                                                                                         |
|                               |                              | <i>Cancer Cohort</i>                                 |                                                     |                  |                                                                                                                                                                                                                         |
|                               |                              | Fully Vaccinated                                     | OR (95% CI): 0.46 (0.31-0.67)                       |                  |                                                                                                                                                                                                                         |
|                               |                              | Booster compared to fully vaccinated with no booster | OR (95% CI): 0.206 (0.062-0.514)                    |                  |                                                                                                                                                                                                                         |



\*A sub-analysis restricted to those with a positive COVID-19 test in the study period; VE was evaluated against progression to hospitalization/death among the infected only

\*\*Fully vaccinated:  $\geq 28$  days post-vaccination with Janssen or  $\geq 14$  days post second dose of Pfizer

**Supplementary Table 2:** Effectiveness of the COVID-19 vaccines against the Omicron variant in reducing infection as compared to other variants.

| Study                           | Vaccine           | Dose                 | Omicron                                                                                                                                                                                                                                                                                                | Other variants |                                                                                                                                                                                                                                                                                                       |
|---------------------------------|-------------------|----------------------|--------------------------------------------------------------------------------------------------------------------------------------------------------------------------------------------------------------------------------------------------------------------------------------------------------|----------------|-------------------------------------------------------------------------------------------------------------------------------------------------------------------------------------------------------------------------------------------------------------------------------------------------------|
|                                 |                   |                      | Infection                                                                                                                                                                                                                                                                                              | Variant        | Infection                                                                                                                                                                                                                                                                                             |
| Ferdinands et al. <sup>34</sup> | Pfizer or Moderna | 2 doses              | <i>Overall</i><br>Adjusted VE (95% CI): 41 (38-43)<br><br><i>&lt;2 months</i><br>Adjusted VE (95% CI): 69 (62-75)<br><br><i>2-3 months</i><br>Adjusted VE (95% CI): 50 (45-55)<br><br><i>4 months</i><br>Adjusted VE (95% CI): 48 (41-54)<br><br><i>≥5 months</i><br>Adjusted VE (95% CI): 37 (34-40)  | Delta          | <i>Overall</i><br>Adjusted VE (95% CI): 80 (79–81)<br><br><i>&lt;2 months</i><br>Adjusted VE (95% CI): 92 (91–94)<br><br><i>2-3 months</i><br>Adjusted VE (95% CI): 88 (86–89)<br><br><i>4 months</i><br>Adjusted VE (95% CI): 85 (83–86)<br><br><i>≥5 months</i><br>Adjusted VE (95% CI): 77 (76–78) |
|                                 | Pfizer or Moderna | 3 doses              | <i>Overall</i><br>Adjusted VE (95% CI): 83 (82-84)<br><br><i>&lt;2 months</i><br>Adjusted VE (95% CI): 87 (85-88)<br><br><i>2-3 months</i><br>Adjusted VE (95% CI): 81 (79-82)<br><br><i>4 months</i><br>Adjusted VE (95% CI): 66 (59-71)<br><br><i>≥5 months</i><br>Adjusted VE (95% CI): 31 (-50-68) |                | <i>Overall</i><br>Adjusted VE (95% CI): 96 (95–96)<br><br><i>&lt;2 months</i><br>Adjusted VE (95% CI): 97 (96–97)<br><br><i>2-3 months</i><br>Adjusted VE (95% CI): 93 (92–94)<br><br><i>≥4 months</i><br>Adjusted VE (95% CI): 89 (64–97)                                                            |
| Abu-Raddad et al. <sup>19</sup> | Pfizer            | 3 doses (vs 2 doses) | Adjusted VE (95% CI): 49.4 (47.1-51.6)                                                                                                                                                                                                                                                                 | Delta          | Adjusted VE (95% CI): 86.1 (67.3-94.1)                                                                                                                                                                                                                                                                |
|                                 | Moderna           | 3 doses (vs 2 doses) | Adjusted VE (95% CI): 47.3 (40.7-53.3)                                                                                                                                                                                                                                                                 |                |                                                                                                                                                                                                                                                                                                       |
| Klein et al. <sup>65</sup>      | Pfizer            | 2 doses              | <i>14-67 days</i><br><br><i>5-11 year olds</i><br>Adjusted VE (95% CI): 51 (30-65)<br><br><i>14-149 days</i><br><br><i>12-15 year olds</i>                                                                                                                                                             | Delta          | <i>14-149 days</i><br><br><i>12-15 year olds</i><br>Adjusted VE (95% CI): 92 (89–94)<br><br><i>16-17 year olds</i><br>Adjusted VE (95% CI): 85 (81–89)                                                                                                                                                |

| Study                        | Vaccine                                 | Dose                         | Omicron                                                                                                                                                                                                                                                                    | Other variants |                                                                                                                                                           |
|------------------------------|-----------------------------------------|------------------------------|----------------------------------------------------------------------------------------------------------------------------------------------------------------------------------------------------------------------------------------------------------------------------|----------------|-----------------------------------------------------------------------------------------------------------------------------------------------------------|
|                              |                                         |                              | Infection                                                                                                                                                                                                                                                                  | Variant        | Infection                                                                                                                                                 |
|                              |                                         |                              | Adjusted VE (95% CI):<br>45 (30-57)<br><br><i>16-17 year olds</i><br>Adjusted VE (95% CI):<br>34 (8-53)<br><br>$\geq 150$ days<br><br><i>12-15 year olds</i><br>Adjusted VE (95% CI):<br>-2 (-25-17)<br><br><i>16-17 year olds</i><br>Adjusted VE (95% CI):<br>-3 (-30-18) |                | $\geq 150$ days<br><br><i>12-15 year olds</i><br>Adjusted VE (95% CI):<br>79 (68-86)<br><br><i>16-17 year olds</i><br>Adjusted VE (95% CI):<br>77 (67-84) |
|                              | Pfizer                                  | 3 doses<br><br>$\geq 7$ days | <i>16-17 years old</i><br>Adjusted VE (95% CI):<br>81 (59-91)                                                                                                                                                                                                              |                |                                                                                                                                                           |
| Andeweg et al. <sup>32</sup> | Previous Infection/Unvaccinated         | NA                           | <i>Omicron BA.1</i><br>*(C1)<br>VE (95% CI):<br>13 (4-21)<br><br>**(C2)<br>VE (95% CI):<br>46 (44-48)<br><br><i>Omicron BA.2</i><br><br>VE (95% CI):<br>47 (44-50)                                                                                                         | Delta          | VE (95% CI):<br>79 (77-81)                                                                                                                                |
|                              | Pfizer, Moderna, AstraZeneca or Janssen | ***Primary Vaccination       | <i>Omicron BA.1</i><br>*(C1)<br>VE (95% CI):<br>22 (18-26)<br><br>**(C2)<br>VE (95% CI):<br>38 (36-40)<br><br><i>Omicron BA.2</i><br>VE (95% CI):<br>35 (33-38)                                                                                                            |                | VE (95% CI):<br>74 (73-75)                                                                                                                                |
|                              | Pfizer, Moderna, AstraZeneca or Janssen | #Booster                     | <i>Omicron BA.1</i><br>*(C1)<br>VE (95% CI):<br>58 (55-62)<br><br>**(C2)<br>VE (95% CI):<br>68 (67-69)<br><br><i>Omicron BA.2</i><br>VE (95% CI):<br>62 (60-63)                                                                                                            |                | VE (95% CI):<br>94 (93-94)                                                                                                                                |

| Study                | Vaccine                                 | Dose                        | Omicron                                                                                                                                                                                                                                                                                                                                                                           | Other variants |                                                                                                                                                                                                                                                                                                                                                                                    |
|----------------------|-----------------------------------------|-----------------------------|-----------------------------------------------------------------------------------------------------------------------------------------------------------------------------------------------------------------------------------------------------------------------------------------------------------------------------------------------------------------------------------|----------------|------------------------------------------------------------------------------------------------------------------------------------------------------------------------------------------------------------------------------------------------------------------------------------------------------------------------------------------------------------------------------------|
|                      |                                         |                             | Infection                                                                                                                                                                                                                                                                                                                                                                         | Variant        | Infection                                                                                                                                                                                                                                                                                                                                                                          |
|                      | Pfizer, Moderna, AstraZeneca or Janssen | Previous Infection /Booster | <i>Omicron BA.1</i><br>*(C1)<br>VE (95% CI):<br>68 (58-75)<br><br>**(C2)<br>VE (95% CI):<br>81 (80-82)<br><br><i>Omicron BA.2</i><br><br>VE (95% CI):<br>81 (80-82)                                                                                                                                                                                                               |                | VE (95% CI):<br>99 (96-100)                                                                                                                                                                                                                                                                                                                                                        |
| Andrews et al.<br>63 | AstraZeneca<br><br>4+ weeks             | 1 dose                      | Adjusted VE (95% CI):<br>17.7 (14.3-21.0)                                                                                                                                                                                                                                                                                                                                         | Delta          | Adjusted VE (95% CI):<br>42.9 (39.8-45.9)                                                                                                                                                                                                                                                                                                                                          |
|                      |                                         | 2 doses                     | 2-4 weeks<br>Adjusted VE (95% CI):<br>48.9 (39.2-57.1)<br><br>5-9 weeks<br>Adjusted VE (95% CI):<br>33.7 (25.0-41.5)<br><br>10-14 weeks<br>Adjusted VE (95% CI):<br>28.6 (20.9-35.6)<br><br>15-19 weeks<br>Adjusted VE (95% CI):<br>17.8 (13.4-21.9)<br><br>20-24 weeks<br>Adjusted VE (95% CI):<br>4.0 (1.9-6.1)<br><br>25+ weeks<br>Adjusted VE (95% CI):<br>-2.7 (-4.2 - -1.2) |                | 2-4 weeks<br>Adjusted VE (95% CI):<br>82.8 (74.5-88.4)<br><br>5-9 weeks<br>Adjusted VE (95% CI):<br>76.5 (70.3-81.5)<br><br>10-14 weeks<br>Adjusted VE (95% CI):<br>69.2 (64.7-73.1)<br><br>15-19 weeks<br>Adjusted VE (95% CI):<br>53.6 (51.6-55.5)<br><br>20-24 weeks<br>Adjusted VE (95% CI):<br>47.4 (46.2-48.5)<br><br>25+ weeks<br>Adjusted VE (95% CI):<br>43.5 (42.4-44.5) |
|                      | AstraZeneca + Pfizer Booster            | 3 doses                     | 1 week<br>Adjusted VE (95% CI):<br>58.8 (57.8-59.7)<br><br>2-4 weeks<br>Adjusted VE (95% CI):<br>62.4 (61.8-63.0)<br><br>5-9 weeks<br>Adjusted VE (95% CI):<br>52.9 (52.1-53.7)<br><br>10+ weeks<br>Adjusted VE (95% CI):<br>39.6 (38.0-41.1)                                                                                                                                     |                | 1 week<br>Adjusted VE (95% CI):<br>88.7 (88.1-89.2)<br><br>2-4 weeks<br>Adjusted VE (95% CI):<br>95.4 (95.1-95.6)<br><br>5-9 weeks<br>Adjusted VE (95% CI):<br>92.6 (92.2-92.9)<br><br>10+ weeks<br>Adjusted VE (95% CI):<br>88.1 (86.7-89.3)                                                                                                                                      |
|                      | AstraZeneca + Moderna Booster           |                             | 1 week<br>Adjusted VE (95% CI):<br>68.0 (67.0-68.9)                                                                                                                                                                                                                                                                                                                               |                | 1 week<br>Adjusted VE (95% CI):<br>91.5 (90.9-92.1)                                                                                                                                                                                                                                                                                                                                |

| Study | Vaccine                                    | Dose    | Omicron                                                  | Other variants |                                                          |
|-------|--------------------------------------------|---------|----------------------------------------------------------|----------------|----------------------------------------------------------|
|       |                                            |         | Infection                                                | Variant        | Infection                                                |
|       |                                            |         | 2-4 weeks<br>Adjusted VE (95% CI):<br>70.1 (69.5-70.7)   |                | 2-4 weeks<br>Adjusted VE (95% CI):<br>97.0 (96.7-97.3)   |
|       |                                            |         | 5-9 weeks<br>Adjusted VE (95% CI):<br>60.9 (59.7-62.1)   |                | 5-9 weeks<br>Adjusted VE (95% CI):<br>94.9 (93.8-95.9)   |
|       | AstraZeneca<br>+<br>AstraZeneca<br>Booster |         | 1 week<br>Adjusted VE (95% CI):<br>57.7 (37.6-71.3)      |                | 1 week<br>Adjusted VE (95% CI):<br>77.1 (55.1-88.3)      |
|       |                                            |         | 2-4 weeks<br>Adjusted VE (95% CI):<br>55.6 (44.4-64.6)   |                | 2-4 weeks<br>Adjusted VE (95% CI):<br>82.3 (71.3-89.0)   |
|       |                                            |         | 5-9 weeks<br>Adjusted VE (95% CI):<br>46.7 (34.3-56.7)   |                | 5-9 weeks<br>Adjusted VE (95% CI):<br>83.3 (69.7-90.8)   |
|       | Pfizer                                     | 1 dose  | 0-3 weeks<br>Adjusted VE (95% CI):<br>42.8 (40.3-45.1)   |                | 0-3 weeks<br>Adjusted VE (95% CI):<br>45.2 (43.3-47.1)   |
|       |                                            |         | 4+ weeks<br>Adjusted VE (95% CI):<br>31.5 (29.9-33.1)    |                | 4+ weeks<br>Adjusted VE (95% CI):<br>72.3 (69.4-74.9)    |
|       |                                            | 2 doses | 2-4 weeks<br>Adjusted VE (95% CI):<br>65.5 (63.9-67.0)   |                | 2-4 weeks<br>Adjusted VE (95% CI):<br>90.9 (89.6-92.0)   |
|       |                                            |         | 5-9 weeks<br>Adjusted VE (95% CI):<br>48.7 (47.1-50.2)   |                | 5-9 weeks<br>Adjusted VE (95% CI):<br>85.5 (84.5-86.5)   |
|       |                                            |         | 10-14 weeks<br>Adjusted VE (95% CI):<br>30.1 (28.7-31.5) |                | 10-14 weeks<br>Adjusted VE (95% CI):<br>78.7 (78.0-79.4) |
|       |                                            |         | 15-19 weeks<br>Adjusted VE (95% CI):<br>15.4 (14.2-16.6) |                | 15-19 weeks<br>Adjusted VE (95% CI):<br>74.4 (73.8-74.9) |
|       |                                            |         | 20-24 weeks<br>Adjusted VE (95% CI):<br>11.5 (10.1-12.9) |                | 20-24 weeks<br>Adjusted VE (95% CI):<br>67.4 (66.5-68.2) |
|       |                                            |         | 25+ weeks<br>Adjusted VE (95% CI):<br>8.8 (7.0-10.5)     |                | 25+ weeks<br>Adjusted VE (95% CI):<br>62.7 (61.6-63.7)   |
|       | Pfizer                                     | 3 doses | 1 week<br>Adjusted VE (95% CI):<br>66.9 (66.1-67.6)      |                | 1 week<br>Adjusted VE (95% CI):<br>92.3 (91.6-92.9)      |
|       |                                            |         | 2-4 weeks<br>Adjusted VE (95% CI):<br>67.2 (66.5-67.8)   |                | 2-4 weeks<br>Adjusted VE (95% CI):<br>95.1 (94.8-95.4)   |
|       |                                            |         | 5-9 weeks<br>Adjusted VE (95% CI):                       |                | 5-9 weeks<br>Adjusted VE (95% CI):                       |

| Study | Vaccine                           | Dose    | Omicron                                                                                                                                                                                                                                                                                                                                                                           | Other variants |                                                                                                                                                                                                                                                                                                                                                                                    |
|-------|-----------------------------------|---------|-----------------------------------------------------------------------------------------------------------------------------------------------------------------------------------------------------------------------------------------------------------------------------------------------------------------------------------------------------------------------------------|----------------|------------------------------------------------------------------------------------------------------------------------------------------------------------------------------------------------------------------------------------------------------------------------------------------------------------------------------------------------------------------------------------|
|       |                                   |         | Infection                                                                                                                                                                                                                                                                                                                                                                         | Variant        | Infection                                                                                                                                                                                                                                                                                                                                                                          |
|       |                                   |         | 55.0 (54.2-55.8)<br><br>10+ weeks<br>Adjusted VE (95% CI):<br>45.7 (44.7-46.7)                                                                                                                                                                                                                                                                                                    |                | 91.8 (91.4-92.1)<br><br>10+ weeks<br>Adjusted VE (95% CI):<br>89.9 (89.2-90.5)                                                                                                                                                                                                                                                                                                     |
|       | Pfizer<br>+<br>Moderna<br>Booster |         | 1 week<br>Adjusted VE (95% CI):<br>74.0 (73.1-74.9)<br><br>2-4 weeks<br>Adjusted VE (95% CI):<br>73.9 (73.1-74.6)<br><br>5-9 weeks<br>Adjusted VE (95% CI):<br>64.4 (62.6-66.1)                                                                                                                                                                                                   |                | 1 week<br>Adjusted VE (95% CI):<br>93.7 (92.7-94.6)<br><br>2-4 weeks<br>Adjusted VE (95% CI):<br>96.6 (96.0-97.1)<br><br>5-9 weeks<br>Adjusted VE (95% CI):<br>94.9 (93.0-96.2)                                                                                                                                                                                                    |
|       | Moderna                           | 1 dose  | 0-3 weeks<br>Adjusted VE (95% CI):<br>47.9 (43.1-52.3)<br><br>4+ weeks<br>Adjusted VE (95% CI):<br>31.9 (27.3-36.1)                                                                                                                                                                                                                                                               |                | 0-3 weeks<br>Adjusted VE (95% CI):<br>60.1 (51.8-66.9)<br><br>4+ weeks<br>Adjusted VE (95% CI):<br>57.4 (52.6-61.8)                                                                                                                                                                                                                                                                |
|       |                                   | 2 doses | 2-4 weeks<br>Adjusted VE (95% CI):<br>75.1 (70.8-78.7)<br><br>5-9 weeks<br>Adjusted VE (95% CI):<br>52.8 (48.2-57.1)<br><br>10-14 weeks<br>Adjusted VE (95% CI):<br>35.6 (32.7-38.4)<br><br>15-19 weeks<br>Adjusted VE (95% CI):<br>25.3 (23.2-27.4)<br><br>20-24 weeks<br>Adjusted VE (95% CI):<br>15.0 (11.6-18.2)<br><br>25+ weeks<br>Adjusted VE (95% CI):<br>14.9 (3.9-24.7) |                | 2-4 weeks<br>Adjusted VE (95% CI):<br>94.5 (90.5-96.9)<br><br>5-9 weeks<br>Adjusted VE (95% CI):<br>91.8 (89.6-93.6)<br><br>10-14 weeks<br>Adjusted VE (95% CI):<br>84.1 (82.7-85.3)<br><br>15-19 weeks<br>Adjusted VE (95% CI):<br>82.8 (81.8-83.7)<br><br>20-24 weeks<br>Adjusted VE (95% CI):<br>76.2 (74.7-77.7)<br><br>25+ weeks<br>Adjusted VE (95% CI):<br>80.4 (67.3-88.2) |
|       | Moderna                           | 3 doses | 1 week<br>Adjusted VE (95% CI):<br>68.1 (65.6-70.5)<br><br>2-4 weeks<br>Adjusted VE (95% CI):<br>66.3 (63.7-68.8)                                                                                                                                                                                                                                                                 |                | 1 week<br>Adjusted VE (95% CI):<br>95.3 (92.1-97.2)<br><br>2-4 weeks<br>Adjusted VE (95% CI):<br>96.4 (91.4-98.5)                                                                                                                                                                                                                                                                  |
|       | Moderna<br>+<br>Pfizer Booster    |         | 1 week<br>Adjusted VE (95% CI):<br>64.3 (61.7-66.8)<br><br>2-4 weeks                                                                                                                                                                                                                                                                                                              |                | 1 week<br>Adjusted VE (95% CI):<br>95.5 (92.5-97.3)<br><br>2-4 weeks                                                                                                                                                                                                                                                                                                               |

| Study                           | Vaccine             | Dose                                           | Omicron                                                                                                            | Other variants     |                                                                                                                    |
|---------------------------------|---------------------|------------------------------------------------|--------------------------------------------------------------------------------------------------------------------|--------------------|--------------------------------------------------------------------------------------------------------------------|
|                                 |                     |                                                | Infection                                                                                                          | Variant            | Infection                                                                                                          |
|                                 |                     |                                                | <i>Adjusted VE (95% CI): 64.9 (62.3-67.3)</i>                                                                      |                    | <i>Adjusted VE (95% CI): 94.7 (89.3-97.3)</i>                                                                      |
| Spensley et al. <sup>43</sup>   | Pfizer, AstraZeneca | 2 doses                                        | Adjusted HR (95% CI): 1.03 (0.6-1.91)                                                                              | SARS-CoV-2 general | Adjusted HR (95% CI): 0.81 (0.39-1.82)<br><br><i>With prior infection</i><br>Adjusted HR (95% CI): 0.62 (0.3-1.38) |
|                                 | Pfizer, AstraZeneca | Booster                                        | Adjusted VE (95% CI): 50 (8-71)                                                                                    |                    | Adjusted HR (95% CI): 0.39 (0.2-0.86)<br><br><i>With prior infection</i><br>Adjusted HR (95% CI): 0.23 (0.11-0.52) |
|                                 | Pfizer              | 2 doses                                        | NR                                                                                                                 |                    | Adjusted HR (95% CI): 0.83 (0.43-1.62)                                                                             |
|                                 | Pfizer              | Booster                                        | Adjusted VE (95% CI): 66 (36-81)                                                                                   |                    | Adjusted HR (95% CI): 0.34 (0.19-0.64)                                                                             |
|                                 | AstraZeneca         | 2 doses                                        | NR                                                                                                                 |                    | Adjusted HR (95% CI): 1.04 (0.57-1.97)                                                                             |
|                                 | AstraZeneca         | Booster                                        | Adjusted VE (95% CI): 47 (2-70)                                                                                    |                    | Adjusted HR (95% CI): 0.53 (0.30-0.98)                                                                             |
| Dorabawila et al. <sup>45</sup> | Pfizer              | 2 doses<br><br><i>10µg<br/>5-11<br/>years</i>  | <i>≤13 days follow up</i><br>VE (95% CI): 65 (62-68)<br><br><i>28-34 days follow up</i><br>VE (95% CI): 12 (8-16)  |                    |                                                                                                                    |
|                                 | Pfizer              | 2 doses<br><br><i>30µg<br/>12-17<br/>years</i> | <i>≤13 days follow up</i><br>VE (95% CI): 76 (71-81)<br><br><i>28-34 days follow up</i><br>VE (95% CI): 56 (48-63) |                    |                                                                                                                    |
| Buchan et al. <sup>46</sup>     | mRNA                | 1 or 2 doses                                   | <i>7-59 days</i><br>Adjusted VE (95% CI): 36 (24-45)<br><br><i>≥240 days</i><br>Adjusted VE (95% CI): 2 (-17-17)   | Delta              | <i>7-59 days</i><br>Adjusted VE (95% CI): 89 (86-92)<br><br><i>≥240 days</i><br>Adjusted VE (95% CI): 80 (74-84)   |
|                                 | mRNA                | 3 doses                                        | <i>0-6 days</i><br>Adjusted VE (95% CI): 36 (29-43)<br><br><i>≥7 days</i><br>Adjusted VE (95% CI): 61 (56-65)      |                    | <i>0-6 days</i><br>Adjusted VE (95% CI): 94 (93-95)<br><br><i>≥7 days</i><br>Adjusted VE (95% CI): 97 (96-98)      |
|                                 | Pfizer              | 3 doses                                        | <i>0-6 days</i><br>Adjusted VE (95% CI): 34 (26-41)<br><br><i>≥7 days</i><br>Adjusted VE (95% CI): 60 (55-65)      |                    | <i>0-6 days</i><br>Adjusted VE (95% CI): 98 (96-99)<br><br><i>≥7 days</i><br>Adjusted VE (95% CI): 97 (96-98)      |
|                                 | Moderna             | 3 doses                                        | <i>0-6 days</i><br>Adjusted VE (95% CI):                                                                           |                    | <i>0-6 days</i><br>Adjusted VE (95% CI):                                                                           |

| Study                 | Vaccine | Dose                                                                    | Omicron                                                                                                                                                                                                                                                                                     | Other variants |                                                                                                                                                                                                                                                                                  |
|-----------------------|---------|-------------------------------------------------------------------------|---------------------------------------------------------------------------------------------------------------------------------------------------------------------------------------------------------------------------------------------------------------------------------------------|----------------|----------------------------------------------------------------------------------------------------------------------------------------------------------------------------------------------------------------------------------------------------------------------------------|
|                       |         |                                                                         | Infection                                                                                                                                                                                                                                                                                   | Variant        | Infection                                                                                                                                                                                                                                                                        |
|                       |         |                                                                         | 43 (32-52)<br><br>≥7 days<br>Adjusted VE (95% CI):<br>65 (55-72)                                                                                                                                                                                                                            |                | 95 (92-97)<br><br>≥7 days<br>Adjusted VE (95% CI):<br>97 (95-98)                                                                                                                                                                                                                 |
| Hansen et al.<br>44   | Pfizer  | 2 doses<br>(14 days post second dose)                                   | <i>1-30 days</i><br>Adjusted VE (95% CI):<br>55.2 (23.5-73.7)<br><br><i>31-60 days</i><br>Adjusted VE (95% CI):<br>16.1 (-20.8-41.7)<br><br><i>61-90 days</i><br>Adjusted VE (95% CI):<br>9.8 (-10.0-26.1)<br><br><i>91-150 days</i><br>Adjusted VE (95% CI): -<br>76.5<br>(-95.3 - -59.5)  | Delta          | <i>1-30 days</i><br>Adjusted VE (95% CI):<br>86.7 (84.6-88.6)<br><br><i>31-60 days</i><br>Adjusted VE (95% CI):<br>80.9 (79.0-82.6)<br><br><i>61-90 days</i><br>Adjusted VE (95% CI):<br>72.8 (71.7-73.8)<br><br><i>91-150 days</i><br>Adjusted VE (95% CI):<br>53.8 (52.9-54.6) |
|                       | Pfizer  | 3 doses<br><br>1-30 days post vaccination<br><i>compared to 2 doses</i> | Adjusted VE (95% CI):<br>54.6 (30.4-70.4)                                                                                                                                                                                                                                                   |                | Adjusted VE (95% CI):<br>81.2 (79.2-82.9)                                                                                                                                                                                                                                        |
|                       | Moderna | 2 doses<br>14 days post vaccination                                     | <i>1-30 days</i><br>Adjusted VE (95% CI):<br>36.7 (-69.9-76.4)<br><br><i>31-60 days</i><br>Adjusted VE (95% CI):<br>30.0 (-41.3-65.4)<br><br><i>61-90 days</i><br>Adjusted VE (95% CI):<br>4.2 (-30.8-29.8)<br><br><i>91-150 days</i><br>Adjusted VE (95% CI): -<br>39.3<br>(-61.6 - -20.0) |                | <i>1-30 days</i><br>Adjusted VE (95% CI):<br>88.2 (83.1-91.8)<br><br><i>31-60 days</i><br>Adjusted VE (95% CI):<br>81.5 (77.7-84.6)<br><br><i>61-90 days</i><br>Adjusted VE (95% CI):<br>72.2 (70.4-74.0)<br><br><i>91-150 days</i><br>Adjusted VE (95% CI):<br>65.0 (63.6-66.3) |
|                       | Moderna | 3 doses<br><br>1-30 days post vaccination<br><i>compared to 2 doses</i> | NR                                                                                                                                                                                                                                                                                          |                | Adjusted VE (95% CI):<br>82.8 (58.8-92.9)                                                                                                                                                                                                                                        |
| Young-Xu et al.<br>16 | mRNA    | 2 doses<br><br>≥14 days                                                 | Adjusted VE (95% CI): 7<br>(3-10)                                                                                                                                                                                                                                                           | Delta          | Adjusted VE (95% CI):<br>55 (51-58)                                                                                                                                                                                                                                              |



| Study                           | Vaccine | Dose                                                                          | Omicron                                                                                                                                                                                                                                                                                                                                  | Other variants |                                     |
|---------------------------------|---------|-------------------------------------------------------------------------------|------------------------------------------------------------------------------------------------------------------------------------------------------------------------------------------------------------------------------------------------------------------------------------------------------------------------------------------|----------------|-------------------------------------|
|                                 |         |                                                                               | Infection                                                                                                                                                                                                                                                                                                                                | Variant        | Infection                           |
|                                 | mRNA    | 3 doses<br>$\geq 14$ days                                                     | Adjusted VE (95% CI):<br>59 (57-61)                                                                                                                                                                                                                                                                                                      |                | Adjusted VE (95% CI):<br>90 (88-92) |
| Patalon et al.<br><sup>29</sup> | Pfizer  | Booster<br><br><i>different time-points compared to taken 5 months before</i> | <i>Time before infection</i><br><i>5 months</i><br>reference<br><br><i>4 months</i><br>Adjusted VE (95% CI):<br>3.6 (0.6-6.5)<br><br><i>3 months</i><br>Adjusted VE (95% CI):<br>16.5 (13-19.9)<br><br><i>2 months</i><br>Adjusted VE (95% CI):<br>35.7 (29.8-41.2)<br><br><i>1 months</i><br>Adjusted VE (95% CI):<br>53.4 (47.7-58.6)  |                |                                     |
|                                 | Pfizer  | Booster<br><br><i>compared to 2-dose only</i>                                 | <i>5 months</i><br>Adjusted VE (95% CI):<br>16 (12.3-19.5)<br><br><i>4 months</i><br>Adjusted VE (95% CI):<br>18.3 (15.2-21.2)<br><br><i>3 months</i><br>Adjusted VE (95% CI):<br>29.1 (26.1-32)<br><br><i>2 months</i><br>Adjusted VE (95% CI):<br>43.2 (38.2-47.8)<br><br><i>1 months</i><br>Adjusted VE (95% CI):<br>59.4 (54.9-63.5) |                |                                     |
| Rufino et al. <sup>36</sup>     | NR      | 1 dose                                                                        | <i>October '21</i><br>VE (95% CI): 34 (22-45)<br><br><i>December '21</i><br>VE (95% CI): 32 (23-41)                                                                                                                                                                                                                                      |                |                                     |
|                                 | NR      | 2 doses                                                                       | <i>October '21</i><br>VE (95% CI): 53 (49-58)<br><br><i>December '21</i><br>VE (95% CI): 45 (39-.50)                                                                                                                                                                                                                                     |                |                                     |
|                                 | NR      | 1 or 2 doses                                                                  | <i>October '21</i><br>VE (95% CI): 49 (45-52)<br><br><i>December '21</i><br>VE (95% CI): 43 (37-48)                                                                                                                                                                                                                                      |                |                                     |
| Powell et al. <sup>39</sup>     | Pfizer  | 1 dose                                                                        | <i>14-20 days</i>                                                                                                                                                                                                                                                                                                                        | Delta          | <i>14-20 days</i>                   |

| Study                       | Vaccine | Dose                               | Omicron                                                                                                                                                                                                                                                                                                                                                      | Other variants |                                                                                                                                                                                                                                                                                                                                                              |
|-----------------------------|---------|------------------------------------|--------------------------------------------------------------------------------------------------------------------------------------------------------------------------------------------------------------------------------------------------------------------------------------------------------------------------------------------------------------|----------------|--------------------------------------------------------------------------------------------------------------------------------------------------------------------------------------------------------------------------------------------------------------------------------------------------------------------------------------------------------------|
|                             |         |                                    | Infection                                                                                                                                                                                                                                                                                                                                                    | Variant        | Infection                                                                                                                                                                                                                                                                                                                                                    |
|                             |         |                                    | <i>12-15 year olds</i><br>Adjusted VE (95% CI):<br>49.6 (43.9-54.8)<br><br><i>16-17 year olds</i><br>Adjusted VE (95% CI):<br>51.4 (42.7-58.8)<br><br><i>day 84+</i><br><i>12-15 year olds</i><br>Adjusted VE (95% CI):<br>17.2 (12.0-22.1)<br><br><i>day 105+</i><br><i>16-17 year olds</i><br>Adjusted VE (95% CI):<br>12.5 (6.9-17.8)                     |                | <i>12-15 year olds</i><br>Adjusted VE (95% CI):<br>74.5 (73.2-75.6)<br><br><i>16-17 year olds</i><br>Adjusted VE (95% CI):<br>75.9 (74.3-77.3)<br><br><i>day 84+</i><br><i>12-15 year olds</i><br>Adjusted VE (95% CI):<br>53.1 (41.6-62.4)<br><br><i>day 105+</i><br><i>16-17 year olds</i><br>Adjusted VE (95% CI):<br>30.9 (25.4-36.0)                    |
|                             | Pfizer  | 2 doses                            | <i>7-13 days</i><br><i>12-15 year olds</i><br>Adjusted VE (95% CI):<br>83.1 (78.2-86.9)<br><br><i>16-17 year olds</i><br>Adjusted VE (95% CI):<br>76.1 (73.4-78.6)<br><br><i>day 14+</i><br><i>12-15 year olds</i><br>Adjusted VE (95% CI):<br>73.0 (66.4-78.3)<br><br><i>day 70+</i><br><i>16-17 year olds</i><br>Adjusted VE (95% CI):<br>22.6 (14.5-29.9) |                | <i>7-13 days</i><br><i>12-15 year olds</i><br>Adjusted VE (95% CI):<br>93.2 (81.5-97.5)<br><br><i>16-17 year olds</i><br>Adjusted VE (95% CI):<br>93.1 (91.6-94.4)<br><br><i>day 14+</i><br><i>12-15 year olds</i><br>Adjusted VE (95% CI):<br>87.2 (73.7-93.8)<br><br><i>day 70+</i><br><i>16-17 year olds</i><br>Adjusted VE (95% CI):<br>83.7 (72.0-90.5) |
| Jalali et al. <sup>21</sup> | mRNA    | 1 dose<br>OR<br>2 doses<br><7 days | Unadjusted VE (95% CI): 22 (0-46)                                                                                                                                                                                                                                                                                                                            | Delta          | Unadjusted VE (95% CI): 31 (0-72)                                                                                                                                                                                                                                                                                                                            |
|                             | mRNA    | 2 doses<br><br>>7 days             | Unadjusted VE (95% CI): 27 (6-49)                                                                                                                                                                                                                                                                                                                            |                | Unadjusted VE (95% CI): 42 (23-55)                                                                                                                                                                                                                                                                                                                           |
|                             | mRNA    | 3 doses<br><br>>7 days             | Unadjusted VE (95% CI): 45 (26-57)                                                                                                                                                                                                                                                                                                                           |                | Unadjusted VE (95% CI): 65 (42-80)                                                                                                                                                                                                                                                                                                                           |
| Tseng et al. <sup>15</sup>  | Moderna | 1 dose                             | Adjusted VE (95% CI): 20.4 (9.5-30.0)                                                                                                                                                                                                                                                                                                                        | Delta          | Adjusted VE (95% CI): 56.7 (40.7-68.4)                                                                                                                                                                                                                                                                                                                       |
|                             | Moderna | 2 doses                            | <i>overall</i><br>Adjusted VE (95% CI):<br>13.9 (10.5-17.1)<br><br><i>&lt;90 days</i><br>Adjusted VE (95% CI):<br>44 (35.1-51.6)<br><br><i>91-180 days</i>                                                                                                                                                                                                   |                | <i>overall</i><br>Adjusted VE (95% CI):<br>63.6 (59.9-66.9)<br><br><i>&lt;90 days</i><br>Adjusted VE (95% CI):<br>80.2 (68.2-87.7)<br><br><i>91-180 days</i>                                                                                                                                                                                                 |

| Study                            | Vaccine                                          | Dose    | Omicron                                                                                                                                                                                                                                                 | Other variants |                                                                                                                                                                                                                                                         |
|----------------------------------|--------------------------------------------------|---------|---------------------------------------------------------------------------------------------------------------------------------------------------------------------------------------------------------------------------------------------------------|----------------|---------------------------------------------------------------------------------------------------------------------------------------------------------------------------------------------------------------------------------------------------------|
|                                  |                                                  |         | Infection                                                                                                                                                                                                                                               | Variant        | Infection                                                                                                                                                                                                                                               |
|                                  |                                                  |         | Adjusted VE (95% CI):<br>23.5 (16.4-30.0)<br><br><i>181-270 days</i><br>Adjusted VE (95% CI):<br>13.8 (10.2-17.3)<br><br>>270 days<br>Adjusted VE (95% CI):<br>5.9 (0.4-11.0)                                                                           |                | Adjusted VE (95% CI):<br>68.9 (60.1-75.8)<br><br><i>181-270 days</i><br>Adjusted VE (95% CI):<br>63.7 (59.8-67.2)<br><br>>270 days<br>Adjusted VE (95% CI):<br>61.3 (55.0-66.7)                                                                         |
|                                  | Moderna                                          | 3 doses | <i>overall</i><br>Adjusted VE (95% CI):<br>70.0 (68.0-71.9)<br>**70.5 (68.6-72.4)<br><br><60 days<br>Adjusted VE (95% CI):<br>71.6 (69.7-73.4)<br>**72.1 (70.2-73.9)<br><br>>60 days<br>Adjusted VE (95% CI):<br>47.4 (40.5-53.5)<br>**51.2 (44.2-57.3) |                | <i>overall</i><br>Adjusted VE (95% CI):<br>94.5 (92.9-95.7)<br>**93.7 (92.2-94.9)<br><br><60 days<br>Adjusted VE (95% CI):<br>93.7 (92.2-94.9)<br>**94.2 (92.7-95.3)<br><br>>60 days<br>Adjusted VE (95% CI):<br>86.0 (78.1-91.1)<br>**88.1 (80.2-92.9) |
| Šmíd et al. <sup>37</sup>        | Pfizer,<br>Moderna,<br>AstraZeneca or<br>Janssen | 2 doses | <2 months<br>Adjusted VE (95% CI):<br>43 (42-44)<br><br>>2 months<br>Adjusted VE (95% CI): 9<br>(8-10)                                                                                                                                                  | Delta          | <2 months<br>Adjusted VE (95% CI):<br>73 (72-74)<br><br>>2 months<br>Adjusted VE (95% CI):<br>57 (56-58)                                                                                                                                                |
|                                  | Pfizer,<br>Moderna,<br>AstraZeneca or<br>Janssen | Booster | <2 months<br>Adjusted VE (95% CI):<br>56 (55-56)<br><br>>2 months<br>Adjusted VE (95% CI):<br>21 (19-23)                                                                                                                                                |                | <2 months<br>Adjusted VE (95% CI):<br>90 (90-91)<br><br>>2 months<br>Adjusted VE (95% CI):<br>82 (79-84)                                                                                                                                                |
| Thompson et al. <sup>60</sup>    | mRNA                                             | 2 doses | <180 days<br>Adjusted VE (95% CI):<br>52 (46-58)<br><br><i>180+ days</i><br>Adjusted VE (95% CI):<br>38 (32-43)                                                                                                                                         | Delta          | <180 days<br>Adjusted VE (95% CI):<br>86 (85-87)<br><br><i>180+ days</i><br>Adjusted VE (95% CI):<br>76 (75-77)                                                                                                                                         |
|                                  | mRNA                                             | 3 doses | Adjusted VE (95% CI):<br>82 (79-84)                                                                                                                                                                                                                     |                | Adjusted VE (95% CI):<br>94 (93-94)                                                                                                                                                                                                                     |
| Chemaitelly et al. <sup>30</sup> | Pfizer                                           | 1 dose  | Omicron (any)<br>0-13 days<br>Adjusted VE (95% CI):<br>9.5 (-39.8-41.3)<br><br>14+ days<br>Adjusted VE (95% CI):<br>31.4 (12.5-46.3)<br><br>Omicron BA.1                                                                                                |                |                                                                                                                                                                                                                                                         |

| Study | Vaccine | Dose    | Omicron                                                                                                                                                                                                                                                                                                                                                                                                                                                                                                                                                                                                                                     | Other variants |           |
|-------|---------|---------|---------------------------------------------------------------------------------------------------------------------------------------------------------------------------------------------------------------------------------------------------------------------------------------------------------------------------------------------------------------------------------------------------------------------------------------------------------------------------------------------------------------------------------------------------------------------------------------------------------------------------------------------|----------------|-----------|
|       |         |         | Infection                                                                                                                                                                                                                                                                                                                                                                                                                                                                                                                                                                                                                                   | Variant        | Infection |
|       |         |         | 0-13 days<br>Adjusted VE (95% CI):<br>23.5 (-70.6-65.7)<br><br>14+ days<br>Adjusted VE (95% CI):<br>39.2 (2.3-62.1)<br><br>Omicron BA.2<br>0-13 days<br>Adjusted VE (95% CI):<br>5.9 (-52.5-41.9)<br><br>14+ days<br>Adjusted VE (95% CI):<br>36.1 (12.1-53.5)                                                                                                                                                                                                                                                                                                                                                                              |                |           |
|       | Pfizer  | 2 doses | Omicron (any)<br>1-3 months<br>Adjusted VE (95% CI):<br>47.8 (40.8-53.9)<br><br>4-6 months<br>Adjusted VE (95% CI):<br>16.3 (9.7-22.5)<br><br>7+ months<br>Adjusted VE<br>(95% CI):<br>-9.0 (-14.5- -3.7)<br><br>Omicron BA.1<br>1-3 months<br>Adjusted VE (95% CI):<br>46.6 (33.4-57.2)<br><br>4-6 months<br>Adjusted VE (95% CI):<br>8.8 (-4.1-20.1)<br><br>7+ months<br>Adjusted VE<br>(95% CI):<br>-17.8 (-28.2- -8.2)<br><br>Omicron BA.2<br>1-3 months<br>Adjusted VE (95% CI):<br>51.7 (43.2-58.9)<br><br>4-6 months<br>Adjusted VE (95% CI):<br>12.4 (3.8-20.3)<br><br>7+ months<br>Adjusted VE<br>(95% CI):<br>-12.1 (-19.1- -5.5) |                |           |
|       | Pfizer  | 3 doses | Omicron (any)                                                                                                                                                                                                                                                                                                                                                                                                                                                                                                                                                                                                                               |                |           |

| Study | Vaccine | Dose    | Omicron                                                                                                                                                                                                                                                                                                                                                                                                           | Other variants |           |
|-------|---------|---------|-------------------------------------------------------------------------------------------------------------------------------------------------------------------------------------------------------------------------------------------------------------------------------------------------------------------------------------------------------------------------------------------------------------------|----------------|-----------|
|       |         |         | Infection                                                                                                                                                                                                                                                                                                                                                                                                         | Variant        | Infection |
|       |         |         | 4-5 weeks<br>Adjusted VE (95% CI):<br>51.5 (45.0-57.2)<br>14+ weeks<br>Adjusted VE (95% CI):<br>21.9 (7.7-33.9)<br>Omicron BA.1<br><1 month<br>Adjusted VE (95% CI):<br>59.9 (51.2-67.0)<br>1+ month<br>Adjusted VE (95% CI):<br>40.5 (30.8-48.8)<br>Omicron BA.2<br><1 month<br>Adjusted VE (95% CI):<br>43.7 (36.5-50.0)<br>1+ month<br>Adjusted VE (95% CI):<br>40.2 (34.2-45.7)                               |                |           |
|       | Moderna | 1 dose  | Omicron (any)<br>0-13 days<br>Adjusted VE (95% CI):<br>9.8 (-94.1-58.1)<br>14+ days<br>Adjusted VE (95% CI):<br>9.5 (-39.9-41.5)<br>Omicron BA.1<br>0-13 days<br>Adjusted VE (95% CI):<br>50.0 (-91.3-86.9)<br>14+ days<br>Adjusted VE (95% CI):<br>-16.8<br>(-137.8-42.6)<br>Omicron BA.2<br>0-13 days<br>Adjusted VE (95% CI):<br>20.0 (-102.7-68.4)<br>14+ days<br>Adjusted VE (95% CI):<br>-15.4 (-95.1-31.8) |                |           |
|       | Moderna | 2 doses | Omicron (any)<br>1-3 months<br>Adjusted VE (95% CI):<br>43.2 (15.0-62.1)<br>4-6 months                                                                                                                                                                                                                                                                                                                            |                |           |

| Study | Vaccine | Dose    | Omicron                                                                                                                                                                                                                                                                                                                                                                                                                                                                                                                                                                        | Other variants |           |
|-------|---------|---------|--------------------------------------------------------------------------------------------------------------------------------------------------------------------------------------------------------------------------------------------------------------------------------------------------------------------------------------------------------------------------------------------------------------------------------------------------------------------------------------------------------------------------------------------------------------------------------|----------------|-----------|
|       |         |         | Infection                                                                                                                                                                                                                                                                                                                                                                                                                                                                                                                                                                      | Variant        | Infection |
|       |         |         | <p>Adjusted VE (95% CI):<br/>18.7 (11.3-25.5)</p> <p>7+ months<br/>Adjusted VE<br/>(95% CI):<br/>-13.7 (-21.3- -6.6)</p> <p>Omicron BA.1<br/>1-3 months<br/>Adjusted VE (95% CI):<br/>71.0 (24.0-89.0)</p> <p>4-6 months<br/>Adjusted VE (95% CI):<br/>31.3 (19.1-41.7)</p> <p>7+ months<br/>Adjusted VE<br/>(95% CI):<br/>-10.2 (-23.1-1.3)</p> <p>Omicron BA.2<br/>1-3 months<br/>Adjusted VE (95% CI):<br/>35.9 (-5.9-61.2)</p> <p>4-6 months<br/>Adjusted VE (95% CI):<br/>9.9 (-0.3-19.0)</p> <p>7+ months<br/>Adjusted VE<br/>(95% CI):<br/>-20.4<br/>(-30.2- -11.2)</p> |                |           |
|       | Moderna | 3 doses | <p>Omicron (any)<br/>4-5 weeks<br/>Adjusted VE (95% CI):<br/>53.7 (39.6-64.6)</p> <p>6+ weeks<br/>Adjusted VE (95% CI):<br/>34.9 (14.6-50.4)</p> <p>Omicron BA.1<br/>&lt;1 month<br/>Adjusted VE (95% CI):<br/>51.5 (32.3-65.2)</p> <p>1+ month<br/>Adjusted VE (95% CI):<br/>45.3 (17.8-63.5)</p> <p>Omicron BA.2<br/>&lt;1 month<br/>Adjusted VE (95% CI):<br/>39.4 (24.8-51.2)</p>                                                                                                                                                                                          |                |           |

| Study                        | Vaccine                    | Dose                | Omicron                                                                                                                                                                                                                                                                                | Other variants |                                                                                                                                                                                                                                                                                        |
|------------------------------|----------------------------|---------------------|----------------------------------------------------------------------------------------------------------------------------------------------------------------------------------------------------------------------------------------------------------------------------------------|----------------|----------------------------------------------------------------------------------------------------------------------------------------------------------------------------------------------------------------------------------------------------------------------------------------|
|                              |                            |                     | Infection                                                                                                                                                                                                                                                                              | Variant        | Infection                                                                                                                                                                                                                                                                              |
|                              |                            |                     | 1+ month<br>Adjusted VE (95% CI):<br>41.9 (23.4-56.0)                                                                                                                                                                                                                                  |                |                                                                                                                                                                                                                                                                                        |
| Eggink et al. <sup>17</sup>  | Pfizer, Moderna or Janssen | ***Fully Vaccinated | ##Overall<br>Adjusted OR (95% CI):<br>###3.6 (3.4-3.7)<br><br><i>12-29 years</i><br>Adjusted OR (95% CI):<br>4.1 (3.9-4.4)<br><br><i>30-59 years</i><br>Adjusted OR (95% CI):<br>3.2 (3.0-3.4)<br><br><i>≥60 years</i><br>Adjusted OR (95% CI):<br>2.8 (2.3-3.2)                       |                |                                                                                                                                                                                                                                                                                        |
| Lewnard et al. <sup>26</sup> | Janssen                    | 1 dose              | <i>Outpatient</i><br>Adjusted HR (95% CI):<br>0.54 (0.36-0.79)<br><br><i>Any setting</i><br>Adjusted HR (95% CI):<br>0.67 (0.49-0.93)                                                                                                                                                  |                | <i>Outpatient</i><br>Adjusted HR (95% CI):<br>0.39 (0.20-0.77)<br><br><i>Any setting</i><br>Adjusted HR (95% CI):<br>0.52 (0.30-0.89)                                                                                                                                                  |
|                              | Janssen + Any booster      | 2 doses             | <i>Outpatient</i><br>Adjusted HR (95% CI):<br>0.46 (0.25-0.84)<br><br><i>Any setting</i><br>Adjusted HR (95% CI):<br>0.61 (0.38-0.99)                                                                                                                                                  |                | <i>Outpatient</i><br>Adjusted HR (95% CI):<br>0.11 (0.01-0.76)<br><br><i>Any setting</i><br>Adjusted HR (95% CI):<br>0.20 (0.05-0.84)                                                                                                                                                  |
|                              | Pfizer or Moderna          | 1 dose              | <i>Outpatient</i><br>Adjusted HR (95% CI):<br>0.46 (0.27-0.77)<br><br><i>Any setting</i><br>Adjusted HR (95% CI):<br>0.59 (0.39-0.89)                                                                                                                                                  |                | <i>Outpatient</i><br>Adjusted HR (95% CI):<br>0.69 (0.35-1.35)<br><br><i>Any setting</i><br>Adjusted HR (95% CI):<br>0.61 (0.32-1.15)                                                                                                                                                  |
|                              | Pfizer or Moderna          | 2 doses             | <i>≤90 days</i><br><br><i>Outpatient</i><br>Adjusted HR (95% CI):<br>0.51 (0.34-0.76)<br><br><i>Any setting</i><br>Adjusted HR (95% CI):<br>0.48 (0.33-0.70)<br><br><i>91-180 days</i><br><br><i>Outpatient</i><br>Adjusted HR (95% CI):<br>0.43 (0.32-0.56)<br><br><i>Any setting</i> |                | <i>≤90 days</i><br><br><i>Outpatient</i><br>Adjusted HR (95% CI):<br>0.17 (0.12-0.24)<br><br><i>Any setting</i><br>Adjusted HR (95% CI):<br>0.23 (0.17-0.30)<br><br><i>91-180 days</i><br><br><i>Outpatient</i><br>Adjusted HR (95% CI):<br>0.27 (0.14-0.54)<br><br><i>Any setting</i> |

| Study                 | Vaccine           | Dose                                                                    | Omicron                                                                                                                                                                                                                      | Other variants |                                                                                                                                                                                                                              |
|-----------------------|-------------------|-------------------------------------------------------------------------|------------------------------------------------------------------------------------------------------------------------------------------------------------------------------------------------------------------------------|----------------|------------------------------------------------------------------------------------------------------------------------------------------------------------------------------------------------------------------------------|
|                       |                   |                                                                         | Infection                                                                                                                                                                                                                    | Variant        | Infection                                                                                                                                                                                                                    |
|                       |                   |                                                                         | Adjusted HR (95% CI):<br>0.50 (0.40-0.64)<br><br><i>≥180 days</i><br><br><i>Outpatient</i><br>Adjusted HR (95% CI):<br>0.52 (0.44-0.61)<br><br><i>Any setting</i><br>Adjusted HR (95% CI):<br>0.60 (0.52-0.69)               |                | Adjusted HR (95% CI):<br>0.33 (0.19-0.58)<br><br><i>≥180 days</i><br><br><i>Outpatient</i><br>Adjusted HR (95% CI):<br>0.41 (0.16-1.01)<br><br><i>Any setting</i><br>Adjusted HR (95% CI):<br>0.32 (0.13-0.78)               |
|                       | Pfizer or Moderna | 3 doses                                                                 | <i>Outpatient</i><br>Adjusted HR (95% CI):<br>0.43 (0.35-0.52)<br><br><i>Any setting</i><br>Adjusted HR (95% CI):<br>0.54 (0.46-0.64)                                                                                        |                | <i>Outpatient</i><br>Adjusted HR (95% CI):<br>0.14 (0.08-0.24)<br><br><i>Any setting</i><br>Adjusted HR (95% CI):<br>0.19 (0.12-0.28)                                                                                        |
| Shrestha et al.<br>42 | Pfizer or Moderna | 2 doses<br><br><i>≥14 days</i>                                          | <i>overall</i><br>Adjusted HR (95% CI):<br>0.48 (0.44–0.53)<br><br><i>AND prior infection</i><br>Adjusted HR (95% CI):<br>0.77 (0.53-1.12)<br><br><i>AND no prior infection</i><br>Adjusted HR (95% CI):<br>0.48 (0.44–0.53) | Pre-Omicron    | <i>overall</i><br>Adjusted HR (95% CI):<br>0.26 (0.24-0.28)<br><br><i>AND prior infection</i><br>Adjusted HR (95% CI):<br>0.78 (0.31-1.96)<br><br><i>AND no prior infection</i><br>Adjusted HR (95% CI):<br>0.26 (0.24-0.28) |
| Krutikov et al.<br>48 | AstraZeneca       | Vaccinated                                                              |                                                                                                                                                                                                                              |                | Adjusted HR (95% CI):<br>1.06 (0.51-2.18)                                                                                                                                                                                    |
|                       | Pfizer            | Vaccinated                                                              |                                                                                                                                                                                                                              |                | Adjusted HR (95% CI):<br>0.89 (0.45-1.73)                                                                                                                                                                                    |
|                       | NR                | Booster                                                                 |                                                                                                                                                                                                                              |                | <i>≤7 days</i><br>Adjusted HR (95% CI):<br>2.00 (0.85-4.65)<br><br><i>&gt;7 days</i><br>Adjusted HR (95% CI):<br>0.56 (0.30-1.06)                                                                                            |
| Nunes et al. 28       | Janssen           | 1 dose                                                                  | Adjusted OR (95% CI):<br>0.81 (0.46-1.43)                                                                                                                                                                                    |                |                                                                                                                                                                                                                              |
|                       | Janssen           | Booster                                                                 | Adjusted OR (95% CI):<br>0.94 (0.44-2.03)                                                                                                                                                                                    |                |                                                                                                                                                                                                                              |
|                       | Janssen           | &No previous infection<br>AND<br>Janssen 1 dose<br>AND<br>IgG >1549 /mL | Unadjusted OR (95% CI): 0.45 (0.20-1.00)<br><br>Adjusted OR (95% CI):<br>0.42 (0.18-0.85)                                                                                                                                    |                |                                                                                                                                                                                                                              |



| Study                | Vaccine                                        | Dose                                                         | Omicron                                                                                                                                              | Other variants |                                                                                                                   |
|----------------------|------------------------------------------------|--------------------------------------------------------------|------------------------------------------------------------------------------------------------------------------------------------------------------|----------------|-------------------------------------------------------------------------------------------------------------------|
|                      |                                                |                                                              | Infection                                                                                                                                            | Variant        | Infection                                                                                                         |
|                      | Janssen                                        | &No previous infection AND Janssen booster AND IgG >1549 /mL | Unadjusted OR (95% CI): 0.76 (0.25-2.27)                                                                                                             |                |                                                                                                                   |
|                      | Pfizer                                         | 2 doses                                                      | Adjusted OR (95% CI): 0.59 (0.23-1.57)                                                                                                               |                |                                                                                                                   |
|                      | &&Previous SARS-CoV-2 NAAT-confirmed infection | NR                                                           | Adjusted OR (95% CI): 0.55 (0.36-0.84)                                                                                                               |                |                                                                                                                   |
| Lyngse et al.<br>23  | Pfizer, AstraZeneca, Moderna or Janssen        | Booster<br><i>compare d to fully vaccinated</i>              | Adjusted OR (95% CI): 0.54 (0.40-0.71)                                                                                                               | Delta          | Adjusted OR (95% CI): 0.38 (0.32-0.46)                                                                            |
|                      | NA                                             | Unvaccinated<br><i>compare d to fully vaccinated</i>         | Adjusted OR (95% CI): 1.04 (0.87-1.24)                                                                                                               |                | Adjusted OR (95% CI): 2.31 (2.09-2.55)                                                                            |
| Lyngse et al.<br>61  | ^Pfizer, Moderna, AstraZeneca, Janssen         | Booster<br><i>compare d to fully vaccinated</i>              | <i>Omicron BA.2 households</i><br>Adjusted OR (95% CI): 0.80 (0.67-0.94)<br><i>Omicron BA.1 households</i><br>Adjusted OR (95% CI): 0.65 (0.58-0.73) |                |                                                                                                                   |
|                      |                                                | Unvaccinated<br><i>compare d to fully vaccinated</i>         | <i>Omicron BA.2 households</i><br>Adjusted OR (95% CI): 1.10 (0.92-1.32)<br><i>Omicron BA.1 households</i><br>Adjusted OR (95% CI): 1.23 (1.09-1.40) |                |                                                                                                                   |
| Nguyen et al.<br>41  | AstraZeneca vs Pfizer                          | 2 doses + mRNA Booster                                       |                                                                                                                                                      | SARs-CoV-2     | Adjusted HR (95% CI): 0.99 (0.88-1.11)                                                                            |
| Accorsi et al.<br>20 | Pfizer                                         | 3 doses                                                      | <i>vs Unvaccinated</i><br>Adjusted OR (95% CI): 0.35 (0.32-0.38)<br><i>vs 2 doses</i><br>Adjusted OR (95% CI):                                       | Delta          | <i>VS Unvaccinated</i><br>Adjusted OR (95% CI): 0.077 (0.070-0.086)<br><i>VS 2 doses</i><br>Adjusted OR (95% CI): |

| Study                | Vaccine           | Dose                                            | Omicron                                                               | Other variants         |                                                                        |
|----------------------|-------------------|-------------------------------------------------|-----------------------------------------------------------------------|------------------------|------------------------------------------------------------------------|
|                      |                   |                                                 | Infection                                                             | Variant                | Infection                                                              |
|                      |                   |                                                 | 0.35 (0.32-0.37)                                                      |                        | 0.17 (0.16-0.19)                                                       |
|                      | Moderna           | 3 doses                                         | <i>vs Unvaccinated</i><br>Adjusted OR (95% CI):<br>0.28 (0.26-0.31)   |                        | <i>VS Unvaccinated</i><br>Adjusted OR (95% CI):<br>0.045 (0.038-0.053) |
|                      |                   |                                                 | <i>vs 2 doses</i><br>Adjusted OR (95% CI):<br>0.31 (0.28-0.34)        |                        | <i>VS 2 doses</i><br>Adjusted OR (95% CI):<br>0.13 (0.11-0.15)         |
|                      | Pfizer or Moderna | 3 doses                                         | <i>vs Unvaccinated</i><br>Adjusted OR (95% CI):<br>0.33 (0.31-0.35)   |                        | <i>VS Unvaccinated</i><br>Adjusted OR (95% CI):<br>0.065 (0.059-0.071) |
|                      |                   |                                                 | <i>vs 2 doses</i><br>Adjusted OR (95% CI):<br>0.34 (0.32-0.36)        |                        | <i>VS 2 doses</i><br>Adjusted OR (95% CI):<br>0.16 (0.14-0.17)         |
| Chaguza et al.<br>53 | Janssen           | 1 dose                                          |                                                                       | Omicron<br>VS<br>Delta | $\geq 5$ months<br>OR (95% CI):<br>1.2786 (0.8199-1.9939)              |
|                      | Moderna           | 2 doses                                         |                                                                       |                        | $\geq 5$ months<br>OR (95% CI):<br>1.9686 (1.4873-2.6058)              |
|                      | Pfizer            | 2 doses                                         |                                                                       |                        | $< 5$ months<br>OR (95% CI):<br>2.324 (1.4604-3.6981)                  |
|                      |                   |                                                 |                                                                       |                        | $\geq 5$ months<br>OR (95% CI):<br>1.8118 (1.4754-2.2249)              |
|                      | NR                | 3 doses                                         |                                                                       |                        | OR (95% CI):<br>3.0177 (1.8418-4.9444)                                 |
|                      | Vaccinated        | 1 dose                                          |                                                                       |                        | OR (95% CI):<br>1.2771 (0.819-1.9916)                                  |
|                      | Vaccinated        | 2 doses                                         |                                                                       |                        | $< 5$ months<br>OR (95% CI):<br>2.3237 (1.4603-3.6976)                 |
|                      |                   |                                                 |                                                                       |                        | $\geq 5$ months<br>OR (95% CI):<br>1.8591 (1.5497-2.2302)              |
|                      | Vaccinated        | 3 doses                                         |                                                                       |                        | OR (95% CI):<br>3.0125 (1.8387-4.9356)                                 |
| Tai et al. 40        | mRNA or Janssen   | Booster<br><i>compare d to fully vaccinated</i> | Adjusted HR (95% CI):<br>0.43 (0.35-0.53)                             |                        |                                                                        |
| Allen et al. 18      | NR                | 2 doses                                         | <i>Reference</i>                                                      | Delta                  | <i>Reference</i>                                                       |
|                      | NR                | 3 doses                                         | <i>Contact Household</i><br>Adjusted RR (95% CI):<br>0.88 (0.79-0.97) |                        | <i>Contact Household</i><br>Adjusted RR (95% CI):<br>0.68 (0.62-0.74)  |
|                      |                   | $> 14$ days                                     | <i>Non-Household</i><br>Adjusted RR (95% CI):<br>0.76 (0.61-0.94)     |                        | <i>Non-Household</i><br>Adjusted RR (95% CI):<br>0.51 (0.39-0.66)      |
|                      |                   |                                                 |                                                                       |                        | <i>Exposer</i>                                                         |

| Study               | Vaccine  | Dose                                             | Omicron                                                                                                                                                                                                                                                                                 | Other variants |                                                                                                                                                                                                                                                                                          |
|---------------------|----------|--------------------------------------------------|-----------------------------------------------------------------------------------------------------------------------------------------------------------------------------------------------------------------------------------------------------------------------------------------|----------------|------------------------------------------------------------------------------------------------------------------------------------------------------------------------------------------------------------------------------------------------------------------------------------------|
|                     |          |                                                  | Infection                                                                                                                                                                                                                                                                               | Variant        | Infection                                                                                                                                                                                                                                                                                |
|                     |          |                                                  | <i>Exposer Household</i><br>Adjusted RR (95% CI): 0.78 (0.69-0.88)<br><br><i>Non-Household</i><br>Adjusted RR (95% CI): 0.95 (0.77-1.16)                                                                                                                                                |                | <i>Household</i><br>Adjusted RR (95% CI): 0.62 (0.54-0.72)<br><br><i>Non-Household</i><br>Adjusted RR (95% CI): 0.84 (0.59-1.19)                                                                                                                                                         |
|                     | NR       | 1 dose<br><br>>21 days                           | <i>Contact Household</i><br>Adjusted RR (95% CI): 0.80 (0.69-0.93)<br><br><i>Non-Household</i><br>Adjusted RR (95% CI): 0.76 (0.47-1.25)<br><br><i>Exposer Household</i><br>Adjusted RR (95% CI): 0.94 (0.83-1.08)<br><br><i>Non-Household</i><br>Adjusted RR (95% CI): 0.9 (0.64-1.26) |                | <i>Contact Household</i><br>Adjusted RR (95% CI): 0.95 (0.86-1.04)<br><br><i>Non-Household</i><br>Adjusted RR (95% CI): 1.02 (0.63-1.66)<br><br><i>Exposer Household</i><br>Adjusted RR (95% CI): 0.96 (0.87-1.06)<br><br><i>Non-Household</i><br>Adjusted RR (95% CI): 1.28 (0.9-1.81)  |
|                     | NA       | Unvaccinated                                     | <i>Contact Household</i><br>Adjusted RR (95% CI): 0.87 (0.79-0.95)<br><br><i>Non-Household</i><br>Adjusted RR (95% CI): 1.05 (0.8-1.36)<br><br><i>Exposer Household</i><br>Adjusted RR (95% CI): 1.00 (0.92-1.09)<br><br><i>Non-Household</i><br>Adjusted RR (95% CI): 1.18 (0.97-1.44) |                | <i>Contact Household</i><br>Adjusted RR (95% CI): 1.16 (1.08-1.24)<br><br><i>Non-Household</i><br>Adjusted RR (95% CI): 0.86 (0.61-1.21)<br><br><i>Exposer Household</i><br>Adjusted RR (95% CI): 1.19 (1.12-1.27)<br><br><i>Non-Household</i><br>Adjusted RR (95% CI): 1.32 (1.06-1.65) |
| Bar-On et al.<br>57 | ^^Pfizer | 3 doses<br>vs<br>4 doses<br>≥12 days             | RR (95% CI):<br>2.0 (2.0-2.1)                                                                                                                                                                                                                                                           |                |                                                                                                                                                                                                                                                                                          |
|                     |          | 4 doses<br>3-7 days<br>vs<br>4 doses<br>≥12 days | RR (95% CI):<br>1.9 (1.8-2.0)<br><br>* RR (95% CI):<br>2.1 (1.9-2.2)                                                                                                                                                                                                                    |                |                                                                                                                                                                                                                                                                                          |

\* C1: Cohort Delta-Omicron BA.1

\*\*C2: Cohort Omicron BA.1-BA.2

\*\*\* **Primary vaccination/full vaccination:** 2 doses of Pfizer, Moderna or AstraZeneca >4 days before the symptom onset or 1 dose of Janssen vaccine more than 28 days before the symptom onset

**#Booster vaccination:** 3 doses at least 7 days before symptom onset or 2 doses after Janssen if the date of last vaccination was after 18 November 2021

**##Unvaccinated** with no prior infection was the reference for the OR analysis. OR: association between vaccination/previous infection and SGTF

###Reads as 3.6 times higher risk of infection with Omicron than with Delta compared with naïve individuals

**&Compared to** no previous infection AND unvaccinated AND IgG <300/mL

**&&Compared to** no previous infection

**^ ORs for susceptibility** by vaccination status. Fully Vaccinated: Pfizer: 7 days after second dose; AstraZeneca: 15 days after second dose; Moderna: 14 days after second dose; Janssen: 14 days after vaccination, and 14 days after the second dose for cross vaccinated individuals or 14 days after previous infection.

**^^ Study included** those that were 60 years of age or older and had received three doses of BNT162b2 at least 4 months before the start of the study period. Sensitivity analysis using ages 20-59 years old.

**Supplementary Table 3:** Effectiveness of the COVID-19 vaccines against the Omicron variant in reducing hospitalization as compared to other variants.

| Study                           | Vaccine           | Dose               | Omicron                                                                                                                                                                                                                                                                                               | Other variants |                                                                                                                                                                                                                                                                                                       |
|---------------------------------|-------------------|--------------------|-------------------------------------------------------------------------------------------------------------------------------------------------------------------------------------------------------------------------------------------------------------------------------------------------------|----------------|-------------------------------------------------------------------------------------------------------------------------------------------------------------------------------------------------------------------------------------------------------------------------------------------------------|
|                                 |                   |                    | Hospitalization                                                                                                                                                                                                                                                                                       | Variant        | Hospitalization                                                                                                                                                                                                                                                                                       |
| Ferdinands et al. <sup>34</sup> | Pfizer or Moderna | 2 doses            | <i>Overall</i><br>Adjusted VE (95% CI): 55 (50–60)<br><br><i>&lt;2 months</i><br>Adjusted VE (95% CI): 71 (51–83)<br><br><i>2-3 months</i><br>Adjusted VE (95% CI): 65 (53–74)<br><br><i>4 months</i><br>Adjusted VE (95% CI): 58 (38–71)<br><br><i>≥5 months</i><br>Adjusted VE (95% CI): 54 (48–59) | Delta          | <i>Overall</i><br>Adjusted VE (95% CI): 85 (84–85)<br><br><i>&lt;2 months</i><br>Adjusted VE (95% CI): 94 (92-96)<br><br><i>2-3 months</i><br>Adjusted VE (95% CI): 91 (89-92)<br><br><i>4 months</i><br>Adjusted VE (95% CI): 90 (89-92)<br><br><i>≥5 months</i><br>Adjusted VE (95% CI): 82 (82-83) |
|                                 | Pfizer or Moderna | 3 doses            | <i>Overall</i><br>Adjusted VE (95% CI): 88 (86–90)<br><br><i>&lt;2 months</i><br>Adjusted VE (95% CI): 91 (88–93)<br><br><i>2-3 months</i><br>Adjusted VE (95% CI): 88 (85–90)<br><br><i>≥4 months</i><br>Adjusted VE (95% CI): 78 (67–85)                                                            |                | <i>Overall</i><br>Adjusted VE (95% CI): 95 (95–96)<br><br><i>&lt;2 months</i><br>Adjusted VE (95% CI): 96 (95–97)<br><br><i>2-3 months</i><br>Adjusted VE (95% CI): 93 (91–95)<br><br><i>≥4 months</i><br>Adjusted VE (95% CI): 76 (14–93)                                                            |
| Gray et al. <sup>64</sup>       | Janssen           | 2 doses<br>Booster | <i>0-13 days</i><br>Adjusted VE (95% CI): 63 (31-81)<br><br><i>14-27 days</i><br>Adjusted VE (95% CI): 84 (67-92)<br><br><i>27-87 days</i><br>Adjusted VE (95% CI): 85 (54-95)                                                                                                                        |                |                                                                                                                                                                                                                                                                                                       |
| Lauring et al. <sup>22</sup>    | Pfizer or Moderna | 2 doses            | <i>Overall</i><br>VE (95% CI): 65 (51-75)<br><br><i>Immunocompetent Only</i>                                                                                                                                                                                                                          | Alpha          | <i>Overall</i><br>VE (95% CI): 85 (82-88)<br><br><i>Immunocompetent Only</i><br>VE (95% CI): 90 (87-93)                                                                                                                                                                                               |

| Study                           | Vaccine                    | Dose                                                    | Omicron                                                                                                                                                                                                                                                                                        | Other variants |                                                                                                                                                                                                                                                                                         |
|---------------------------------|----------------------------|---------------------------------------------------------|------------------------------------------------------------------------------------------------------------------------------------------------------------------------------------------------------------------------------------------------------------------------------------------------|----------------|-----------------------------------------------------------------------------------------------------------------------------------------------------------------------------------------------------------------------------------------------------------------------------------------|
|                                 |                            |                                                         | Hospitalization                                                                                                                                                                                                                                                                                | Variant        | Hospitalization                                                                                                                                                                                                                                                                         |
|                                 |                            |                                                         | VE (95% CI): 66 (49-77)                                                                                                                                                                                                                                                                        |                | <i>Immunocompromised Only</i><br>VE (95% CI): 58 (33-73)                                                                                                                                                                                                                                |
|                                 | Pfizer or Moderna          | 2 doses                                                 |                                                                                                                                                                                                                                                                                                | Delta          | <i>Overall</i><br>VE (95% CI): 85 (83-87)<br><br><i>Immunocompetent Only</i><br>VE (95% CI): 88 (86-90)<br><br><i>Immunocompromised Only</i><br>VE (95% CI): 63 (52-71)<br><br><i>18-64 years old</i><br>VE (95% CI): 88 (86-90)<br><br><i>≥65 years old</i><br>VE (95% CI): 81 (77-84) |
|                                 | Pfizer or Moderna          | 3 doses                                                 | <i>Overall</i><br>VE (95% CI): 86 (77-91)<br><br><i>Immunocompetent Only</i><br>VE (95% CI): 86 (75-92)                                                                                                                                                                                        |                | <i>Overall</i><br>VE (95% CI): 94 (92-95)<br><br><i>Immunocompetent Only</i><br>VE (95% CI): 97 (95-98)<br><br><i>Immunocompromised Only</i><br>VE (95% CI): 87 (78-92)                                                                                                                 |
| Lee et al. <sup>25</sup>        | Pfizer, Moderna or Janssen | Fully vaccinated or Booster<br><br><i>Cancer Cohort</i> | OR (95% CI): 2.01 (1.10–3.67) (compared to unvaccinated)                                                                                                                                                                                                                                       |                |                                                                                                                                                                                                                                                                                         |
| Dorabawila et al. <sup>45</sup> | Pfizer                     | 2 doses<br><br>10µg for 5-11 year olds                  | VE (95% CI):<br><br><i>Dec 13-19</i><br>100 (-189-100)<br><br><i>Dec 20-26</i><br>73 (-7-97)<br><br><i>Dec 27-Jan 2</i><br>82 (45-96)<br><br><i>Jan 3-9</i><br>74 (36-96)<br><br><i>Jan 10-16</i><br>68 (28, 91)<br><br><i>Jan 17-23</i><br>46 (-15,77)<br><br><i>Jan 24-30</i><br>48 (-12-75) |                |                                                                                                                                                                                                                                                                                         |
|                                 | Pfizer                     | 2 doses                                                 | VE (95% CI):<br><br><i>Nov 29- Dec 5</i>                                                                                                                                                                                                                                                       |                |                                                                                                                                                                                                                                                                                         |

| Study                         | Vaccine                                 | Dose                     | Omicron                                                                                                                                                                                                                                                                                                                                | Other variants |                                                                                                          |
|-------------------------------|-----------------------------------------|--------------------------|----------------------------------------------------------------------------------------------------------------------------------------------------------------------------------------------------------------------------------------------------------------------------------------------------------------------------------------|----------------|----------------------------------------------------------------------------------------------------------|
|                               |                                         |                          | Hospitalization                                                                                                                                                                                                                                                                                                                        | Variant        | Hospitalization                                                                                          |
|                               |                                         | 30µg for 12-17-year olds | 94 (76,99)<br><br><i>Dec 6 -Dec 12</i><br>95 (64, 100)<br><br><i>Dec 13-19</i><br>85 (63-95)<br><br><i>Dec 20-26</i><br>78 (63, 88)<br><br><i>Dec 27- Jan 2</i><br>74 (63, 82)<br><br><i>Jan 3-9</i><br>74 (63-82)<br><br><i>Jan 10-16</i><br>75 (64, 86)<br><br><i>Jan 17-23</i><br>75 (61, 83)<br><br><i>Jan 24-30</i><br>73 (53-87) |                |                                                                                                          |
| Young-Xu et al. <sup>16</sup> | *mRNA                                   | 2 doses<br>≥14 days      | Adjusted VE (95% CI):<br>44 (26-58)<br><br>24 (-1-43)                                                                                                                                                                                                                                                                                  | Delta          | Adjusted VE (95% CI):<br>75 (70-80)<br><br>57 (45-66)                                                    |
|                               | mRNA                                    | 3 doses<br>≥14 days      | Adjusted VE (95% CI):<br>87 (80-91)<br><br>69 (54-79)                                                                                                                                                                                                                                                                                  |                | Adjusted VE (95% CI):<br>95 (91-97)<br><br>45 (-5-71)                                                    |
| Tseng et al. <sup>15</sup>    | Moderna                                 | 1 dose                   | N/A                                                                                                                                                                                                                                                                                                                                    | Delta          | Adjusted VE (95% CI):<br>71.2 (-68.7-97.4)                                                               |
|                               | Moderna                                 | 2 doses                  | Adjusted VE (95% CI):<br>84.5 (23.0-96.9)                                                                                                                                                                                                                                                                                              |                | Adjusted VE (95% CI):<br>99.0 (93.9-99.9)                                                                |
|                               | Moderna                                 | 3 doses                  | Adjusted VE (95% CI):<br>99.2 (76.3-100.0)                                                                                                                                                                                                                                                                                             |                | Adjusted VE (95% CI):<br>99.7 (96.5-100.0)                                                               |
| Šmíd et al. <sup>37</sup>     | Pfizer, Moderna, AstraZeneca or Janssen | 2 doses                  | <2 months<br>Adjusted VE (95% CI):<br>45 (29-57)<br><br>>2 months<br>Adjusted VE (95% CI):<br>29 (21-37)                                                                                                                                                                                                                               | Delta          | <2 months<br>Adjusted VE (95% CI):<br>75 (68-80)<br><br>>2 months<br>Adjusted VE (95% CI):<br>79 (78-81) |
|                               | Pfizer, Moderna, AstraZeneca or Janssen | Booster                  | <2 months<br>Adjusted VE (95% CI):<br>87 (84-88)<br><br>>2 months<br>Adjusted VE (95% CI):<br>79 (75-83)                                                                                                                                                                                                                               |                | <2 months<br>Adjusted VE (95% CI):<br>98 (97-98)<br><br>>2 months<br>Adjusted VE (95% CI):<br>97 (95-98) |
| Thompson et al. <sup>60</sup> | mRNA                                    | 2 doses                  | <180 days<br>Adjusted VE (95% CI):<br>81 (65-90)                                                                                                                                                                                                                                                                                       | Delta          | <180 days<br>Adjusted VE (95% CI):<br>90 (89-90)                                                         |

| Study                         | Vaccine                  | Dose                                                   | Omicron                                                                                                                                                                                                   | Other variants            |                                                                                                                                                                                                                                                                                                                                             |
|-------------------------------|--------------------------|--------------------------------------------------------|-----------------------------------------------------------------------------------------------------------------------------------------------------------------------------------------------------------|---------------------------|---------------------------------------------------------------------------------------------------------------------------------------------------------------------------------------------------------------------------------------------------------------------------------------------------------------------------------------------|
|                               |                          |                                                        | Hospitalization                                                                                                                                                                                           | Variant                   | Hospitalization                                                                                                                                                                                                                                                                                                                             |
|                               |                          |                                                        | <i>180+ days</i><br>Adjusted VE (95% CI):<br>57 (39-70)                                                                                                                                                   |                           | <i>180+ days</i><br>Adjusted VE (95% CI):<br>81 (80-82)                                                                                                                                                                                                                                                                                     |
|                               | mRNA                     | 3 doses                                                | Adjusted VE (95% CI):<br>90 (80-94)                                                                                                                                                                       |                           | Adjusted VE (95% CI):<br>94 (93-95)                                                                                                                                                                                                                                                                                                         |
| Collie et al. <sup>47</sup>   | Pfizer                   | 2 doses                                                | Adjusted VE (95% CI):<br>70 (62-76)<br><br><i>SGTF Sensitivity<br/>Analysis</i><br>69 (48-81)                                                                                                             | Delta                     | Adjusted VE (95% CI):<br>93 (90-94)                                                                                                                                                                                                                                                                                                         |
| Marks et al. <sup>52</sup>    | NR                       | &&Fully<br>Vaccinated                                  |                                                                                                                                                                                                           | Omicron/D<br>elta         | RR (95% CI): 6.3 (4.4-<br>8.6)<br><br><i>unvaccinated to fully<br/>vaccinated</i>                                                                                                                                                                                                                                                           |
| Spensley et al. <sup>43</sup> | Pfizer or<br>AstraZeneca | 2 doses                                                |                                                                                                                                                                                                           | SARS-<br>CoV-2<br>general | Adjusted HR (95% CI):<br>0.23 (0.03-1.91)                                                                                                                                                                                                                                                                                                   |
|                               | Pfizer or<br>AstraZeneca | Booster                                                |                                                                                                                                                                                                           |                           | Adjusted HR (95% CI):<br>0.40 (0.10-2.63)                                                                                                                                                                                                                                                                                                   |
| Powell et al. <sup>39</sup>   | Pfizer                   | 1 dose                                                 |                                                                                                                                                                                                           | Delta                     | <i>0-27 days</i><br><i>12-15 year olds</i><br>Adjusted VE (95% CI):<br>14.2 (-25.6-41.4)<br><br><i>16-17 year olds</i><br>Adjusted VE (95% CI):<br>64.6 (40.7-78.9)<br><br><i>day 28+</i><br><i>12-15 year olds</i><br>Adjusted VE (95% CI):<br>83.4 (54.0-94.0)<br><br><i>16-17 year olds</i><br>Adjusted VE (95% CI):<br>76.3 (61.1-85.6) |
| Veneti et al. <sup>27</sup>   | Pfizer or<br>Moderna     | 1 dose<br><21 days                                     | Adjusted HR (95% CI):<br>2.03 (0.24–17.4)                                                                                                                                                                 | Delta                     | Adjusted HR (95% CI):<br>1.18 (0.56–2.5)                                                                                                                                                                                                                                                                                                    |
|                               | Pfizer or<br>Moderna     | 1 dose<br>≥21 days<br><i>AND</i><br>2 doses<br><7 days | Adjusted HR (95% CI):<br>0.71 (0.20–2.51)                                                                                                                                                                 |                           | Adjusted HR (95% CI):<br>0.19 (0.09–0.38)                                                                                                                                                                                                                                                                                                   |
|                               | Pfizer or<br>Moderna     | 2 doses                                                | <i>7-179 days</i><br>Adjusted HR (95% CI):<br>0.34 (0.17-0.68)<br><br><i>&gt;180 days</i><br>Adjusted HR (95% CI):<br>0.59 (0.28-1.22)<br><br><i>Overall</i><br>Adjusted HR (95% CI):<br>0.50 (0.26-0.96) |                           | <i>7-179 days</i><br>Adjusted HR (95% CI):<br>0.07 (0.05-0.10)<br><br><i>&gt;180 days</i><br>Adjusted HR (95% CI):<br>0.16 (0.12-0.21)<br><br><i>Overall</i><br>Adjusted HR (95% CI):<br>0.12 (0.09–0.14)                                                                                                                                   |



| Study                               | Vaccine                               | Dose                                            | Omicron                                                                                                                                                                                                                                                                                | Other variants   |                                                                                            |
|-------------------------------------|---------------------------------------|-------------------------------------------------|----------------------------------------------------------------------------------------------------------------------------------------------------------------------------------------------------------------------------------------------------------------------------------------|------------------|--------------------------------------------------------------------------------------------|
|                                     |                                       |                                                 | Hospitalization                                                                                                                                                                                                                                                                        | Variant          | Hospitalization                                                                            |
|                                     | Pfizer or Moderna                     | 3 doses<br>≥ 7 days                             | Adjusted HR (95% CI):<br>0.14 (0.06-0.31)                                                                                                                                                                                                                                              |                  | Adjusted HR (95% CI):<br>0.12 (0.09-0.17)                                                  |
| Davies et al. <sup>33</sup>         | Pfizer or Janssen                     | #Fully Vaccinated                               | Adjusted HR (95% CI):<br>0.45 (0.36-0.56)                                                                                                                                                                                                                                              | Delta            | Adjusted HR (95% CI):<br>0.53 (0.44-0.64)                                                  |
| Paredes et al. <sup>24</sup>        | Pfizer, Moderna or Janssen            | Unvaccinated<br>or<br>1 dose<br><21 days        | Adjusted HR (95% CI):<br>0.79 (0.37-1.67)                                                                                                                                                                                                                                              | Delta            | Adjusted HR (95% CI):<br>2.39 (1.32-4.32)                                                  |
|                                     | Pfizer, Moderna or Janssen            | 1 dose<br>≥21 days<br>to<br>Booster<br><21 days | Adjusted HR (95% CI):<br>0.49 (0.29-0.83)                                                                                                                                                                                                                                              |                  | Adjusted HR (95% CI):<br>0.93 (0.71-1.22)                                                  |
|                                     | Pfizer, Moderna or Janssen            | Booster<br>≥21 days                             | Adjusted HR (95% CI):<br>0.44 (0.21-0.93)                                                                                                                                                                                                                                              |                  | Adjusted HR (95% CI):<br>0.75 (0.41-1.34)                                                  |
|                                     | Pfizer, Moderna or Janssen            | Unvaccinated<br>or<br>1 dose<br><21 days        |                                                                                                                                                                                                                                                                                        | Any              | reference                                                                                  |
|                                     | Pfizer, Moderna or Janssen            | 1 dose<br>≥21 days<br>to<br>Booster<br><21 days |                                                                                                                                                                                                                                                                                        |                  | Adjusted HR (95% CI):<br>0.40 (0.35-0.45)                                                  |
|                                     | Pfizer, Moderna or Janssen            | Booster<br>≥21 days                             |                                                                                                                                                                                                                                                                                        |                  | Adjusted HR (95% CI):<br>0.31 (0.19-0.51)                                                  |
| Ulloa et al. <sup>38</sup>          | **NR                                  | 2 doses                                         |                                                                                                                                                                                                                                                                                        | Omicron vs Delta | Adjusted HR (95% CI):<br>0.44 (0.29-0.65)<br><br>** Adjusted HR (95% CI): 0.40 (0.20-0.80) |
| Patalon et al. <sup>29</sup>        | Pfizer                                | Booster                                         | 5 months<br>reference<br><br>4 months<br>Adjusted OR (95% CI):<br>0.876 (0.477-1.607)<br><br>3 months<br>Adjusted OR (95% CI):<br>0.812 (0.345-1.911)<br><br>2 months<br>Adjusted OR (95% CI):<br>0.672 (0.075-6.052)<br><br>1 months<br>Adjusted OR (95% CI):<br>2.681 (0.321-22.383) |                  |                                                                                            |
| Peralta-Santos et al. <sup>59</sup> | Pfizer, Moderna, AstraZeneca, Janssen | <sup>s</sup> Incomplete Vaccination             | Adjusted HR (95% CI):<br>0.388 (0.122-1.24)                                                                                                                                                                                                                                            |                  |                                                                                            |

| Study                           | Vaccine                                         | Dose                                                               | Omicron                                     | Other variants         |                                  |
|---------------------------------|-------------------------------------------------|--------------------------------------------------------------------|---------------------------------------------|------------------------|----------------------------------|
|                                 |                                                 |                                                                    | Hospitalization                             | Variant                | Hospitalization                  |
|                                 |                                                 | <sup>\$\$</sup> Complete Vaccination                               | Adjusted HR (95% CI):<br>0.162 (0.116-0.23) |                        |                                  |
|                                 |                                                 | <sup>\$\$\$</sup> Booster                                          | Adjusted HR (95% CI):<br>0.073 (0.035-0.15) |                        |                                  |
| Auvigne et al.<br><sup>56</sup> | Pfizer,<br>Moderna,<br>AstraZeneca<br>, Janssen | Booster<br><br><i>Compared to<br/>primary<br/>vaccination</i>      |                                             | Omicron<br>OR<br>Delta | HR (95% CI):<br>1.49 (1.08–2.07) |
|                                 |                                                 | Unvaccinated<br><br><i>Compared to<br/>primary<br/>vaccination</i> |                                             |                        | HR (95% CI):<br>6.53 (5.48–7.79) |

\*Sub-analysis restricted to those with a positive COVID-19 test in the study period; VE was evaluated against progression to hospitalization/death among the infected only

\*\*Hospitalization or death

#Fullyvaccinated: 2 doses ( $\geq 14$  days) of Pfizer or 1 dose ( $\geq 28$  days) of Janssen

&&Fully vaccinated: received the final dose in their primary series  $\geq 14$  days before

<sup>§</sup>Incomplete vaccination: anytime between the uptake of the first dose of a COVID-19 vaccine (ChAdOx1, BNT162b2 or mRNA1273) and up to 14 days after the second dose uptake

<sup>\$\$</sup>Complete vaccination: 14 or more days following second dose vaccine uptake or first dose of Ad26.COV2.S or up to 14 days after the booster dose uptake

<sup>\$\$\$</sup>Booster: 14 or more days following booster dose vaccine uptake
